# Supplementary material for: Sustained activation of EGFR-ERK1/2 signaling limits the therapeutic response to tigecycline-induced inhibition of mitochondrial translation in liver cancer
Source: Research Square preprint supplement (doi:10.21203/rs.3.rs-1452915/v1), 2022-03-25
Supplement: Supplementary file 1 [file 47643836f80b332d36314924.xlsx]

## Sheet: Sheet1
Supplementary Table 5. List of differentially expressed genes (DEGs) of the tigecycline group versus control group in MHCC97H cells.
Gene ID	Gene Name	Log2fold change	P value
Upregulated genes (357)
ENSG00000073146	MOV10L1	7.63829	4.44e-06
ENSG00000107731	UNC5B	6.9055	2.17e-58
ENSG00000135842	NIBAN1	6.59512	6.76e-117
ENSG00000287796	AC016925.3	6.49393	4.36e-05
ENSG00000213401	MAGEA12	5.69593	0.00779497
ENSG00000214548	MEG3	5.66247	5.26e-06
ENSG00000116183	PAPPA2	5.52456	3.47e-20
ENSG00000146678	IGFBP1	5.22903	1.35e-154
ENSG00000174951	FUT1	5.12329	6.7e-08
ENSG00000147614	ATP6V0D2	4.97372	0.00019241
ENSG00000248101	AC002116.1	4.76823	4.1e-05
ENSG00000075407	ZNF37A	4.7649	1.19e-15
ENSG00000239467	AC007405.3	4.66259	0.00102567
ENSG00000128872	TMOD2	4.40997	2.1e-11
ENSG00000062524	LTK	4.37384	1.02e-05
ENSG00000265401	AC093484.3	4.14033	2.21e-06
ENSG00000170689	HOXB9	3.95785	9e-07
ENSG00000135406	PRPH	3.94867	9.18e-05
ENSG00000224259	LINC01133	3.66176	3.72e-11
ENSG00000260953	AC009093.4	3.62108	4.57e-05
ENSG00000286248	AC069209.2	3.61939	0.00413566
ENSG00000153132	CLGN	3.58783	2.25e-45
ENSG00000164744	SUN3	3.5668	2.18e-05
ENSG00000026559	KCNG1	3.49353	4.07e-16
ENSG00000128965	CHAC1	3.48567	8.77e-40
ENSG00000136010	ALDH1L2	3.4401	1.85e-75
ENSG00000121552	CSTA	3.43454	3.48e-15
ENSG00000167103	PIP5KL1	3.43339	3.36e-14
ENSG00000223722	IFITM3P2	3.4258	0.00372477
ENSG00000137825	ITPKA	3.38183	1.04e-189
ENSG00000223421	AL354854.1	3.36032	0.000351699
ENSG00000170965	PLAC1	3.33836	0.00356621
ENSG00000109321	AREG	3.31156	3.24e-121
ENSG00000052344	PRSS8	3.25007	0.000813183
ENSG00000116701	NCF2	3.24895	5.96e-13
ENSG00000174564	IL20RB	3.23957	7.41e-46
ENSG00000092621	PHGDH	3.23268	1.48e-72
ENSG00000214814	FER1L6	3.19529	4.24e-10
ENSG00000116761	CTH	3.17459	1.42e-64
ENSG00000128165	ADM2	3.16656	5.63e-38
ENSG00000146592	CREB5	3.02411	0.00150937
ENSG00000179148	ALOXE3	3.00676	5.95e-05
ENSG00000057593	F7	2.96204	1.56e-09
ENSG00000130707	ASS1	2.94001	2.74e-16
ENSG00000234840	LINC01239	2.91311	1.98e-06
ENSG00000138772	ANXA3	2.88856	1.73e-08
ENSG00000145777	TSLP	2.8619	2.89e-08
ENSG00000196517	SLC6A9	2.82238	3.42e-46
ENSG00000020181	ADGRA2	2.78242	0.00127132
ENSG00000197405	C5AR1	2.76324	1.25e-18
ENSG00000261273	AC138512.1	2.74376	0.000349085
ENSG00000180044	C3orf80	2.73631	0.00183766
ENSG00000235056	AC010983.1	2.69857	2.85e-14
ENSG00000163347	CLDN1	2.67866	1.5e-20
ENSG00000070669	ASNS	2.61501	1.64e-136
ENSG00000198796	ALPK2	2.61497	9.63e-24
ENSG00000278948	AL031587.5	2.61333	2.61e-06
ENSG00000183671	GPR1	2.59391	0.00336521
ENSG00000248290	TNXA	2.58279	0.00111023
ENSG00000130766	SESN2	2.58196	4.49e-79
ENSG00000106948	AKNA	2.58069	9.2e-53
ENSG00000186642	PDE2A	2.57226	7.83e-08
ENSG00000196136	SERPINA3	2.55632	0.000976227
ENSG00000130513	GDF15	2.54157	6.42e-86
ENSG00000255595	AC007368.1	2.51141	0.000692035
ENSG00000176046	NUPR1	2.4945	1.19e-13
ENSG00000173210	ABLIM3	2.47771	5.03e-74
ENSG00000258791	LINC00520	2.4681	0.00268646
ENSG00000123095	BHLHE41	2.46277	1.91e-08
ENSG00000126500	FLRT1	2.42102	6.22e-07
ENSG00000143333	RGS16	2.37605	0.000253065
ENSG00000178752	ERFE	2.35448	2.91e-10
ENSG00000135502	SLC26A10	2.34376	0.00552194
ENSG00000181885	CLDN7	2.3172	1.54e-08
ENSG00000092607	TBX15	2.30476	8.34e-11
ENSG00000160179	ABCG1	2.30223	1.24e-09
ENSG00000162772	ATF3	2.2718	0.00016746
ENSG00000084636	COL16A1	2.25465	7.8e-07
ENSG00000215182	MUC5AC	2.24977	0.00422475
ENSG00000203697	CAPN8	2.22709	0.00385641
ENSG00000111981	ULBP1	2.227	0.000648558
ENSG00000261713	SSTR5-AS1	2.17302	8.37e-11
ENSG00000071242	RPS6KA2	2.15276	0.00221331
ENSG00000152689	RASGRP3	2.15017	2.02e-14
ENSG00000163359	COL6A3	2.12836	7.84e-21
ENSG00000166750	SLFN5	2.11525	1.4e-75
ENSG00000228063	LYPLAL1-DT	2.10731	3.13e-08
ENSG00000263155	MYZAP	2.10352	8.2e-07
ENSG00000166173	LARP6	2.10066	2.35e-36
ENSG00000274276	CBSL	2.09198	2.49e-08
ENSG00000136732	GYPC	2.08899	9.39e-12
ENSG00000172432	GTPBP2	2.07769	1.47e-79
ENSG00000168209	DDIT4	2.06478	6.12e-53
ENSG00000135253	KCP	2.02927	0.00104969
ENSG00000135069	PSAT1	2.02672	2.31e-102
ENSG00000069812	HES2	2.02529	2.34e-08
ENSG00000286153	AP000331.1	2.01957	5.21e-15
ENSG00000166922	SCG5	2.01462	2.47e-09
ENSG00000154319	FAM167A	2.01108	2.04e-06
ENSG00000185519	FAM131C	2.00239	0.00601472
ENSG00000125962	ARMCX5	1.99277	1.36e-10
ENSG00000261652	C15orf65	1.982	0.00232127
ENSG00000253227	AC090192.2	1.96651	3.63e-18
ENSG00000125046	SSUH2	1.9474	0.000772237
ENSG00000230882	AC005077.4	1.91887	7.65e-12
ENSG00000101188	NTSR1	1.91585	5.45e-05
ENSG00000227088	AC012494.1	1.91421	0.000722237
ENSG00000173349	SFT2D3	1.90813	0.003295
ENSG00000100889	PCK2	1.90408	1.42e-34
ENSG00000284981	UPK3BL2	1.90401	0.000114758
ENSG00000125826	RBCK1	1.9011	8.55e-65
ENSG00000108509	CAMTA2	1.90005	1.82e-41
ENSG00000260284	TPSP2	1.89382	4.61e-17
ENSG00000168679	SLC16A4	1.89108	4.17e-34
ENSG00000182600	SNORC	1.88625	9.95e-07
ENSG00000196352	CD55	1.8846	7.86e-63
ENSG00000100139	MICALL1	1.88208	1.44e-44
ENSG00000264175	MIR3189	1.87604	1.51e-05
ENSG00000274414	AL121772.1	1.80375	3.45e-06
ENSG00000168672	LRATD2	1.78984	1.31e-11
ENSG00000154263	ABCA10	1.77398	0.00335977
ENSG00000241697	TMEFF1	1.77209	0.0033843
ENSG00000118898	PPL	1.76786	1.86e-08
ENSG00000140044	JDP2	1.7601	1.06e-16
ENSG00000123689	G0S2	1.75926	2.9e-28
ENSG00000134548	SPX	1.75254	3.66e-23
ENSG00000167767	KRT80	1.74403	2.55e-27
ENSG00000265972	TXNIP	1.73355	4.51e-07
ENSG00000153294	ADGRF4	1.73342	1.85e-09
ENSG00000115226	FNDC4	1.72622	8.07e-13
ENSG00000086730	LAT2	1.7173	4.44e-05
ENSG00000175197	DDIT3	1.70177	3.95e-24
ENSG00000162687	KCNT2	1.69781	1.2e-05
ENSG00000168477	TNXB	1.68262	3.77e-16
ENSG00000184792	OSBP2	1.67293	0.000844007
ENSG00000100994	PYGB	1.67276	1.24e-74
ENSG00000156510	HKDC1	1.6677	1.09e-67
ENSG00000259230	LINC02323	1.66538	0.00420962
ENSG00000167676	PLIN4	1.66295	1.02e-19
ENSG00000178878	APOLD1	1.66261	1.42e-07
ENSG00000163393	SLC22A15	1.66176	1.04e-06
ENSG00000075643	MOCOS	1.64823	7.5e-45
ENSG00000128283	CDC42EP1	1.63978	2.42e-27
ENSG00000157064	NMNAT2	1.62446	0.00803915
ENSG00000119138	KLF9	1.6237	8.48e-05
ENSG00000101255	TRIB3	1.62254	1.03e-56
ENSG00000128604	IRF5	1.61815	0.000740231
ENSG00000260920	AL031985.3	1.61718	4.05e-06
ENSG00000260916	CCPG1	1.61586	2.59e-48
ENSG00000160200	CBS	1.61057	1.42e-35
ENSG00000119771	KLHL29	1.60347	3.6e-05
ENSG00000137878	GCOM1	1.60008	1.03e-06
ENSG00000115902	SLC1A4	1.59662	1.22e-26
ENSG00000230387	AL118508.1	1.58914	0.00324406
ENSG00000105928	GSDME	1.58409	1.29e-18
ENSG00000172183	ISG20	1.57918	1.2e-09
ENSG00000112715	VEGFA	1.57725	5.13e-45
ENSG00000186567	CEACAM19	1.57086	3.68e-08
ENSG00000273825	FP700111.2	1.55882	0.00412843
ENSG00000147883	CDKN2B	1.55447	1.45e-22
ENSG00000106105	GARS1	1.55262	1.05e-67
ENSG00000088899	LZTS3	1.55014	1.18e-14
ENSG00000163697	APBB2	1.54772	1.82e-17
ENSG00000113739	STC2	1.53472	4.41e-32
ENSG00000136068	FLNB	1.53026	1.5e-57
ENSG00000140941	MAP1LC3B	1.52966	3.54e-48
ENSG00000132470	ITGB4	1.5273	3.16e-54
ENSG00000088386	SLC15A1	1.52721	3.94e-06
ENSG00000178607	ERN1	1.5264	1.97e-21
ENSG00000031698	SARS1	1.52325	2.08e-42
ENSG00000198380	GFPT1	1.52179	3.23e-52
ENSG00000167601	AXL	1.51604	3.64e-27
ENSG00000120278	PLEKHG1	1.51195	7.29e-08
ENSG00000155495	MAGEC1	1.51068	3.47e-08
ENSG00000060982	BCAT1	1.50844	4.17e-18
ENSG00000153714	LURAP1L	1.5024	9.06e-13
ENSG00000080031	PTPRH	1.49793	1.94e-32
ENSG00000074935	TUBE1	1.49702	7.19e-13
ENSG00000187800	PEAR1	1.49444	1.35e-21
ENSG00000074276	CDHR2	1.48576	2.84e-09
ENSG00000230409	TCEA1P2	1.48449	3.08e-06
ENSG00000221968	FADS3	1.47007	1.22e-14
ENSG00000204876	AC021218.1	1.46395	9.01e-10
ENSG00000106366	SERPINE1	1.46352	2.79e-64
ENSG00000229314	ORM1	1.4635	0.0039661
ENSG00000022267	FHL1	1.45501	6.88e-05
ENSG00000187840	EIF4EBP1	1.45441	1.79e-28
ENSG00000116584	ARHGEF2	1.4513	1.3e-51
ENSG00000261824	LINC00662	1.44961	3.83e-26
ENSG00000167995	BEST1	1.44923	5.23e-07
ENSG00000148426	PROSER2	1.44035	1.37e-12
ENSG00000185052	SLC24A3	1.4309	0.00296737
ENSG00000091622	PITPNM3	1.42472	1.14e-10
ENSG00000102032	RENBP	1.42464	2.03e-11
ENSG00000158825	CDA	1.41409	0.000954602
ENSG00000124882	EREG	1.41349	2.31e-25
ENSG00000101104	PABPC1L	1.41261	3.68e-41
ENSG00000089041	P2RX7	1.41144	5.33e-05
ENSG00000178038	ALS2CL	1.41017	8.6e-09
ENSG00000185567	AHNAK2	1.40566	1.65e-28
ENSG00000284776	AL121900.1	1.38951	3.55e-12
ENSG00000188910	GJB3	1.3858	0.000218675
ENSG00000070540	WIPI1	1.37366	4.27e-08
ENSG00000173221	GLRX	1.36871	5.83e-25
ENSG00000105048	TNNT1	1.36473	1.25e-15
ENSG00000147010	SH3KBP1	1.36115	4.86e-33
ENSG00000110619	CARS1	1.35914	2.78e-37
ENSG00000170485	NPAS2	1.35668	1.38e-27
ENSG00000151062	CACNA2D4	1.3501	2.52e-08
ENSG00000267120	AD000671.2	1.3475	0.00865375
ENSG00000187735	TCEA1	1.33657	2.79e-47
ENSG00000065357	DGKA	1.33628	0.00684403
ENSG00000088305	DNMT3B	1.32734	2.23e-13
ENSG00000172216	CEBPB	1.3263	1.48e-20
ENSG00000136235	GPNMB	1.32407	6.92e-06
ENSG00000104419	NDRG1	1.31756	0.00180307
ENSG00000166986	MARS1	1.31755	4.48e-46
ENSG00000147894	C9orf72	1.31063	0.00458386
ENSG00000172137	CALB2	1.30002	1.3e-11
ENSG00000153879	CEBPG	1.29289	3.27e-35
ENSG00000137819	PAQR5	1.29043	0.000459133
ENSG00000166831	RBPMS2	1.28661	0.000492786
ENSG00000179546	HTR1D	1.28446	3.93e-06
ENSG00000134954	ETS1	1.28403	8.87e-21
ENSG00000115295	CLIP4	1.28057	4.7e-26
ENSG00000138685	FGF2	1.27464	4.58e-12
ENSG00000153208	MERTK	1.26162	6.82e-18
ENSG00000126583	PRKCG	1.2603	0.00337519
ENSG00000141582	CBX4	1.25989	7.81e-29
ENSG00000240891	PLCXD2	1.25548	3.18e-08
ENSG00000183696	UPP1	1.25431	1.4e-22
ENSG00000120254	MTHFD1L	1.2531	3.09e-13
ENSG00000166401	SERPINB8	1.25128	0.000136002
ENSG00000162614	NEXN	1.24082	0.000196026
ENSG00000116852	KIF21B	1.24062	0.00376635
ENSG00000236256	DIAPH2-AS1	1.23927	0.000375447
ENSG00000124191	TOX2	1.23119	0.000794103
ENSG00000230257	NFE4	1.22633	1.57e-08
ENSG00000188372	ZP3	1.22608	6.17e-10
ENSG00000073734	ABCB11	1.22444	0.00452426
ENSG00000240303	ACAD11	1.22368	2.01e-06
ENSG00000178105	DDX10	1.22339	4.25e-25
ENSG00000139725	RHOF	1.22219	9.18e-23
ENSG00000261771	DNAAF4-CCPG1	1.22052	0.00229978
ENSG00000131015	ULBP2	1.21989	0.00823781
ENSG00000136826	KLF4	1.21917	0.00302744
ENSG00000128591	FLNC	1.21851	1.08e-15
ENSG00000078114	NEBL	1.217	6.22e-13
ENSG00000113070	HBEGF	1.21435	0.00141092
ENSG00000198727	MT-CYB	1.21387	3.8e-44
ENSG00000099875	MKNK2	1.2122	7.47e-24
ENSG00000138166	DUSP5	1.21177	1.44e-19
ENSG00000165030	NFIL3	1.20966	2.84e-16
ENSG00000006459	KDM7A	1.20893	8.59e-07
ENSG00000088854	C20orf194	1.20495	2.46e-05
ENSG00000080007	DDX43	1.20215	0.000320957
ENSG00000230487	PSMG3-AS1	1.19853	2.07e-05
ENSG00000160746	ANO10	1.1983	4.5e-23
ENSG00000084734	GCKR	1.19679	0.00141876
ENSG00000159200	RCAN1	1.19669	3.54e-10
ENSG00000162545	CAMK2N1	1.19553	3e-08
ENSG00000121350	PYROXD1	1.19443	4.62e-22
ENSG00000140105	WARS1	1.19402	3.58e-30
ENSG00000163814	CDCP1	1.19287	2.36e-05
ENSG00000070404	FSTL3	1.19066	7.78e-11
ENSG00000171747	LGALS4	1.19032	0.00743253
ENSG00000251629	LINC02241	1.18979	0.00300848
ENSG00000184056	VPS33B	1.18814	0.00213666
ENSG00000168159	RNF187	1.18408	1.77e-26
ENSG00000073008	PVR	1.17695	1.53e-25
ENSG00000005884	ITGA3	1.1769	1.75e-37
ENSG00000103187	COTL1	1.17619	0.00364319
ENSG00000273637	AL139260.2	1.16821	9.1e-10
ENSG00000230478	Z96811.1	1.16691	6.84e-07
ENSG00000175591	P2RY2	1.16544	3.5e-07
ENSG00000120053	GOT1	1.16433	2.96e-15
ENSG00000184545	DUSP8	1.16413	0.00010129
ENSG00000227038	GTF2IP7	1.15957	0.0036759
ENSG00000198910	L1CAM	1.15598	0.00707805
ENSG00000087266	SH3BP2	1.15481	3.89e-18
ENSG00000153531	ADPRHL1	1.15333	0.00166556
ENSG00000240476	LINC00973	1.15135	1.02e-11
ENSG00000287712	AC005865.2	1.1494	0.00103797
ENSG00000073737	DHRS9	1.14908	2.89e-12
ENSG00000142197	DOP1B	1.1464	2.85e-05
ENSG00000185022	MAFF	1.14448	3.6e-06
ENSG00000136868	SLC31A1	1.14217	2.22e-23
ENSG00000019549	SNAI2	1.13892	0.0015787
ENSG00000163565	IFI16	1.13878	2.4e-25
ENSG00000188766	SPRED3	1.13846	0.000694178
ENSG00000008323	PLEKHG6	1.13844	9.51e-09
ENSG00000121797	CCRL2	1.13803	0.00729297
ENSG00000128052	KDR	1.13068	2.45e-05
ENSG00000225614	ZNF469	1.12907	5.54e-14
ENSG00000157150	TIMP4	1.12763	2.12e-05
ENSG00000092929	UNC13D	1.12704	7.04e-13
ENSG00000135905	DOCK10	1.12699	0.000310322
ENSG00000115641	FHL2	1.12626	5.3e-17
ENSG00000167994	RAB3IL1	1.12532	1.17e-08
ENSG00000169136	ATF5	1.125	1.63e-19
ENSG00000128272	ATF4	1.12127	5.19e-34
ENSG00000135549	PKIB	1.12101	4.54e-09
ENSG00000070778	PTPN21	1.11851	1.96e-05
ENSG00000133639	BTG1	1.11777	6.42e-17
ENSG00000119938	PPP1R3C	1.1148	0.00072032
ENSG00000108828	VAT1	1.11369	2.55e-24
ENSG00000233426	EIF3FP3	1.11276	0.00332758
ENSG00000132386	SERPINF1	1.10963	7.51e-06
ENSG00000113389	NPR3	1.10914	1.1e-07
ENSG00000139793	MBNL2	1.10661	5.95e-07
ENSG00000197461	PDGFA	1.09948	3.13e-05
ENSG00000130779	CLIP1	1.09371	4.97e-29
ENSG00000103257	SLC7A5	1.09167	1.29e-23
ENSG00000198435	NRARP	1.09125	7.57e-05
ENSG00000142677	IL22RA1	1.09087	0.00248442
ENSG00000068971	PPP2R5B	1.08741	2.64e-06
ENSG00000164683	HEY1	1.08715	1.14e-11
ENSG00000166123	GPT2	1.08554	5.13e-16
ENSG00000138356	AOX1	1.08083	0.00217341
ENSG00000182199	SHMT2	1.07588	3.29e-24
ENSG00000024422	EHD2	1.07165	9.95e-24
ENSG00000128294	TPST2	1.07057	2.43e-08
ENSG00000182919	C11orf54	1.06942	0.000104543
ENSG00000165029	ABCA1	1.06802	4.71e-16
ENSG00000188599	NPIPP1	1.06531	0.00146084
ENSG00000010438	PRSS3	1.06454	1.25e-07
ENSG00000172927	MYEOV	1.06095	3.04e-13
ENSG00000013588	GPRC5A	1.06071	6.93e-17
ENSG00000166046	TCP11L2	1.05917	9.73e-05
ENSG00000143786	CNIH3	1.05903	0.00018212
ENSG00000168843	FSTL5	1.05824	0.00129648
ENSG00000123240	OPTN	1.05572	1.45e-15
ENSG00000020577	SAMD4A	1.05363	2.84e-05
ENSG00000138413	IDH1	1.0532	3.97e-30
ENSG00000010818	HIVEP2	1.04792	3.68e-05
ENSG00000106070	GRB10	1.04377	1.21e-26
ENSG00000001460	STPG1	1.03827	1.58e-07
ENSG00000188290	HES4	1.03459	0.000656597
ENSG00000166971	AKTIP	1.03334	3.03e-05
ENSG00000185561	TLCD2	1.02995	4.42e-05
ENSG00000101928	MOSPD1	1.02874	2.45e-10
ENSG00000197860	SGTB	1.02861	0.000195608
ENSG00000167972	ABCA3	1.02651	1.52e-06
ENSG00000103021	CCDC113	1.01903	0.00115995
ENSG00000074527	NTN4	1.01859	9.18e-22
ENSG00000122861	PLAU	1.01768	2.23e-09
ENSG00000229953	AL590666.2	1.01702	1.69e-14
ENSG00000260604	AL590004.3	1.01581	1.12e-05
ENSG00000198758	EPS8L3	1.01574	1.26e-09
ENSG00000158747	NBL1	1.01533	1.18e-06
ENSG00000091490	SEL1L3	1.01499	6.53e-20
ENSG00000188177	ZC3H6	1.01093	0.00143357
ENSG00000261150	EPPK1	1.0084	2.2e-07
ENSG00000099812	MISP	1.00447	4.95e-20
ENSG00000135083	CCNJL	1.00427	3.09e-06
ENSG00000177238	TRIM72	1.00335	1.25e-06
ENSG00000144468	RHBDD1	1.00254	2.18e-09
Downregulated genes (261)
ENSG00000285304	Z83844.2	-8.50271	0.00282642
ENSG00000243896	OR2A7	-5.03812	0.000288972
ENSG00000165376	CLDN2	-4.89516	5.07e-15
ENSG00000169507	SLC38A11	-4.46626	1.79e-09
ENSG00000107159	CA9	-4.24797	2.52e-08
ENSG00000019991	HGF	-4.08758	8.2e-05
ENSG00000141314	RHBDL3	-4.01987	0.00135544
ENSG00000005981	ASB4	-3.75534	1.05e-32
ENSG00000205403	CFI	-3.74996	0.00556837
ENSG00000180251	SLC9A4	-3.71894	0.00066791
ENSG00000078596	ITM2A	-3.591	2.46e-05
ENSG00000114378	HYAL1	-3.47531	0.000145575
ENSG00000166148	AVPR1A	-3.4136	3.7e-08
ENSG00000248144	ADH1C	-3.37469	3.39e-34
ENSG00000090104	RGS1	-3.34133	0.00022916
ENSG00000115165	CYTIP	-3.32642	1.63e-08
ENSG00000132744	ACY3	-3.21692	0.00450199
ENSG00000250562	RPL38P4	-3.15734	4.85e-09
ENSG00000019186	CYP24A1	-2.93808	0.00026857
ENSG00000166035	LIPC	-2.87629	5.67e-13
ENSG00000286596	AC098595.1	-2.81105	0.000902544
ENSG00000154188	ANGPT1	-2.79773	2.46e-06
ENSG00000163631	ALB	-2.78475	0.00270185
ENSG00000185432	METTL7A	-2.73274	1.68e-12
ENSG00000174502	SLC26A9	-2.71254	3.23e-05
ENSG00000127324	TSPAN8	-2.63988	0.000329292
ENSG00000272196	H2AC19	-2.62991	3.35e-10
ENSG00000285837	AC024598.1	-2.61864	0.00418997
ENSG00000231298	MANCR	-2.61099	8.26e-06
ENSG00000154165	GPR15	-2.60178	3.9e-05
ENSG00000146411	SLC2A12	-2.59184	1.54e-05
ENSG00000129538	RNASE1	-2.58304	4.05e-15
ENSG00000116774	OLFML3	-2.5597	1.22e-07
ENSG00000137801	THBS1	-2.52389	9.54e-70
ENSG00000164488	DACT2	-2.46613	0.0045059
ENSG00000258175	LINC02300	-2.44799	1.97e-06
ENSG00000162692	VCAM1	-2.42939	3.37e-07
ENSG00000224099	AC104823.1	-2.42578	6.88e-05
ENSG00000171564	FGB	-2.40557	3.26e-10
ENSG00000117152	RGS4	-2.39589	0.0010414
ENSG00000157315	TMED6	-2.3896	0.0012807
ENSG00000173237	C11orf86	-2.37956	0.000268902
ENSG00000269416	LINC01224	-2.37573	1.22e-05
ENSG00000101230	ISM1	-2.35668	0.000438188
ENSG00000015520	NPC1L1	-2.35393	1.62e-10
ENSG00000165188	RNF183	-2.32309	0.00132804
ENSG00000258017	AC011603.3	-2.31323	1.4e-05
ENSG00000188404	SELL	-2.29455	1.14e-11
ENSG00000099260	PALMD	-2.28521	0.00335864
ENSG00000213886	UBD	-2.28046	3.37e-11
ENSG00000266094	RASSF5	-2.26061	0.00513862
ENSG00000169429	CXCL8	-2.20174	0.000428778
ENSG00000214381	LINC00488	-2.19577	0.000190843
ENSG00000129151	BBOX1	-2.18771	6.85e-05
ENSG00000204616	TRIM31	-2.18543	2.74e-23
ENSG00000168961	LGALS9	-2.17656	6.14e-11
ENSG00000047457	CP	-2.17118	7.62e-48
ENSG00000206557	TRIM71	-2.16221	0.00230841
ENSG00000140807	NKD1	-2.15866	9.14e-12
ENSG00000113361	CDH6	-2.13574	4.17e-42
ENSG00000229425	AJ009632.2	-2.11783	7.43e-06
ENSG00000183336	BOLA2	-2.09478	0.000202888
ENSG00000133800	LYVE1	-2.09282	0.0023013
ENSG00000115221	ITGB6	-2.0879	0.000324118
ENSG00000149591	TAGLN	-2.08578	2.13e-08
ENSG00000124635	H2BC11	-2.0534	0.0060214
ENSG00000180730	SHISA2	-2.04554	2.16e-07
ENSG00000148702	HABP2	-2.04123	2.19e-16
ENSG00000164125	GASK1B	-2.03424	6.89e-07
ENSG00000169851	PCDH7	-2.0067	1.52e-35
ENSG00000126246	IGFLR1	-1.99493	1.6e-05
ENSG00000284377	AL589669.1	-1.98418	7.64e-10
ENSG00000135373	EHF	-1.9749	1.53e-48
ENSG00000156755	IGKV1OR-2	-1.91606	4.16e-52
ENSG00000168685	IL7R	-1.90821	6.45e-10
ENSG00000069122	ADGRF5	-1.90481	2.34e-05
ENSG00000125780	TGM3	-1.90109	0.00378832
ENSG00000168542	COL3A1	-1.87939	0.000721766
ENSG00000225530	SP3P	-1.8667	1.19e-07
ENSG00000196542	SPTSSB	-1.86343	8.56e-22
ENSG00000189057	FAM111B	-1.82492	0.000116715
ENSG00000171236	LRG1	-1.81117	0.00457995
ENSG00000237988	OR2I1P	-1.80649	0.00480146
ENSG00000042062	RIPOR3	-1.79038	0.00407473
ENSG00000143127	ITGA10	-1.78838	1.52e-05
ENSG00000127589	TUBBP1	-1.78574	1.06e-05
ENSG00000172986	GXYLT2	-1.77917	0.00446978
ENSG00000163739	CXCL1	-1.7765	0.000563276
ENSG00000188906	LRRK2	-1.72813	1.38e-05
ENSG00000225380	IGKV1OR9-2	-1.71928	1.08e-18
ENSG00000095303	PTGS1	-1.70377	0.000334613
ENSG00000241635	UGT1A1	-1.70071	0.00545457
ENSG00000147041	SYTL5	-1.70053	1.23e-09
ENSG00000042980	ADAM28	-1.69347	2.62e-12
ENSG00000248592	STIMATE-MUSTN1	-1.69161	0.00872134
ENSG00000185585	OLFML2A	-1.69006	0.00342039
ENSG00000197457	STMN3	-1.68744	8.77e-07
ENSG00000164761	TNFRSF11B	-1.67461	0.0054556
ENSG00000145920	CPLX2	-1.66348	1.06e-18
ENSG00000197063	MAFG	-1.66336	0.00857266
ENSG00000169174	PCSK9	-1.65764	8.43e-08
ENSG00000257167	TMPO-AS1	-1.64777	1.61e-07
ENSG00000171560	FGA	-1.64112	8.97e-05
ENSG00000069535	MAOB	-1.63115	3.18e-14
ENSG00000143631	FLG	-1.60876	0.00624628
ENSG00000257027	AC010186.3	-1.60831	0.00613778
ENSG00000168237	GLYCTK	-1.5918	3.01e-25
ENSG00000079150	FKBP7	-1.58705	0.000342949
ENSG00000077092	RARB	-1.5663	2.43e-10
ENSG00000135218	CD36	-1.56587	0.000372007
ENSG00000171631	P2RY6	-1.55645	0.00224315
ENSG00000170271	FAXDC2	-1.55431	4.42e-05
ENSG00000184588	PDE4B	-1.54725	1.77e-07
ENSG00000122035	RASL11A	-1.53878	0.000203593
ENSG00000110876	SELPLG	-1.53393	6.51e-06
ENSG00000139679	LPAR6	-1.53044	6.66e-06
ENSG00000166963	MAP1A	-1.52919	1.03e-08
ENSG00000088992	TESC	-1.52658	0.000301683
ENSG00000016391	CHDH	-1.52586	0.000129326
ENSG00000109107	ALDOC	-1.50219	0.0001291
ENSG00000258529	AP001781.2	-1.49422	0.0040708
ENSG00000109084	TMEM97	-1.49357	1.04e-26
ENSG00000129173	E2F8	-1.4773	8.77e-07
ENSG00000113209	PCDHB5	-1.47371	3.56e-05
ENSG00000085840	ORC1	-1.4572	2.77e-13
ENSG00000151655	ITIH2	-1.45521	8.99e-40
ENSG00000165272	AQP3	-1.44931	1.52e-10
ENSG00000073756	PTGS2	-1.44567	1.96e-11
ENSG00000068078	FGFR3	-1.44258	2.91e-09
ENSG00000165757	JCAD	-1.43799	0.000222074
ENSG00000007968	E2F2	-1.4336	1.28e-07
ENSG00000204099	NEU4	-1.43331	6.46e-11
ENSG00000173269	MMRN2	-1.43107	0.00011792
ENSG00000196167	COLCA1	-1.42804	6.23e-13
ENSG00000111319	SCNN1A	-1.42596	1.9e-10
ENSG00000168077	SCARA3	-1.42424	5.6e-09
ENSG00000114268	PFKFB4	-1.42373	0.00153275
ENSG00000187634	SAMD11	-1.41774	3.03e-05
ENSG00000175305	CCNE2	-1.41025	3.47e-08
ENSG00000110436	SLC1A2	-1.40925	0.00859274
ENSG00000114638	UPK1B	-1.40872	0.000237866
ENSG00000223764	LINC02593	-1.40672	0.00252072
ENSG00000176890	TYMS	-1.40523	2.03e-29
ENSG00000168916	ZNF608	-1.39629	0.0011973
ENSG00000244187	TMEM141	-1.39018	6.65e-18
ENSG00000256594	AC010186.2	-1.37276	0.00714226
ENSG00000075213	SEMA3A	-1.3654	1.95e-13
ENSG00000137834	SMAD6	-1.36429	1.51e-16
ENSG00000110917	MLEC	-1.3584	5.35e-43
ENSG00000213347	MXD3	-1.35584	1.1e-05
ENSG00000134824	FADS2	-1.35423	1.11e-28
ENSG00000228544	CCDC183-AS1	-1.35259	1.27e-05
ENSG00000129514	FOXA1	-1.34891	1.04e-15
ENSG00000255774	LINC02747	-1.3484	8.56e-05
ENSG00000086696	HSD17B2	-1.34415	0.0046887
ENSG00000231528	FAM225A	-1.34022	0.00142423
ENSG00000064651	SLC12A2	-1.3346	3.15e-19
ENSG00000145604	SKP2	-1.3328	2.57e-09
ENSG00000283228	AC068547.1	-1.33235	0.0032888
ENSG00000183479	TREX2	-1.32761	0.000124932
ENSG00000027697	IFNGR1	-1.32395	2.82e-26
ENSG00000092853	CLSPN	-1.32194	6.77e-13
ENSG00000164638	SLC29A4	-1.31926	8.4e-05
ENSG00000100767	PAPLN	-1.31202	0.000431523
ENSG00000123080	CDKN2C	-1.31014	1.3e-08
ENSG00000152076	CCDC74B	-1.30873	2.81e-06
ENSG00000275215	RNA5-8SN3	-1.3029	0.000402613
ENSG00000171848	RRM2	-1.30123	4.26e-18
ENSG00000266976	AC079466.1	-1.29904	7.77e-40
ENSG00000181449	SOX2	-1.29884	2.38e-15
ENSG00000166803	PCLAF	-1.28418	1.92e-11
ENSG00000139438	FAM222A	-1.27981	0.000545469
ENSG00000154639	CXADR	-1.27854	0.00530112
ENSG00000091513	TF	-1.27766	0.00106293
ENSG00000184012	TMPRSS2	-1.27614	0.000602553
ENSG00000186469	GNG2	-1.27453	8.15e-11
ENSG00000106004	HOXA5	-1.26911	0.00534337
ENSG00000106927	AMBP	-1.26712	0.00071941
ENSG00000118777	ABCG2	-1.25787	4.55e-25
ENSG00000214826	DDX12P	-1.25731	2.09e-14
ENSG00000138823	MTTP	-1.2539	2.42e-08
ENSG00000173258	ZNF483	-1.24046	0.000543764
ENSG00000256663	AC112777.1	-1.23658	1.3e-06
ENSG00000124664	SPDEF	-1.23229	2.79e-06
ENSG00000116133	DHCR24	-1.23184	1.37e-21
ENSG00000118513	MYB	-1.22684	0.00369216
ENSG00000131153	GINS2	-1.21036	8.27e-08
ENSG00000003137	CYP26B1	-1.20877	0.00170386
ENSG00000115290	GRB14	-1.206	1.98e-10
ENSG00000120437	ACAT2	-1.20157	8.7e-14
ENSG00000213949	ITGA1	-1.19689	3.58e-09
ENSG00000171227	TMEM37	-1.19309	7.53e-06
ENSG00000023445	BIRC3	-1.19234	4.75e-10
ENSG00000161888	SPC24	-1.19135	4.62e-06
ENSG00000080493	SLC4A4	-1.1908	4.86e-05
ENSG00000122952	ZWINT	-1.18778	2.81e-15
ENSG00000137491	SLCO2B1	-1.18661	0.000283161
ENSG00000255121	CCDC84-DT	-1.18253	0.00547522
ENSG00000274070	CASTOR2	-1.17974	2.62e-17
ENSG00000105290	APLP1	-1.16898	0.000284108
ENSG00000167889	MGAT5B	-1.16671	0.00165887
ENSG00000163040	CCDC74A	-1.16474	0.000387889
ENSG00000198734	F5	-1.16411	2.43e-16
ENSG00000152661	GJA1	-1.16351	0.000118475
ENSG00000227619	AL391056.1	-1.15619	1.28e-05
ENSG00000285897	AC004687.2	-1.1552	2.69e-06
ENSG00000154760	SLFN13	-1.1541	4.88e-14
ENSG00000274012	RN7SL2	-1.15347	0.00128991
ENSG00000276043	UHRF1	-1.15076	1.01e-14
ENSG00000100342	APOL1	-1.1431	2.3e-15
ENSG00000169896	ITGAM	-1.14101	0.00618874
ENSG00000118849	RARRES1	-1.14081	0.000104545
ENSG00000113368	LMNB1	-1.13344	3.34e-20
ENSG00000116954	RRAGC	-1.1327	0.00093986
ENSG00000237773	AC073332.1	-1.12922	0.00469365
ENSG00000231210	COMETT	-1.12319	9.08e-05
ENSG00000129195	PIMREG	-1.12182	3.36e-07
ENSG00000154146	NRGN	-1.11475	1.31e-07
ENSG00000132646	PCNA	-1.11282	9.91e-18
ENSG00000140451	PIF1	-1.1118	0.00116274
ENSG00000181418	DDN	-1.10463	0.00784698
ENSG00000255330	AL096711.2	-1.10246	3.37e-06
ENSG00000140534	TICRR	-1.10091	8.29e-12
ENSG00000156398	SFXN2	-1.10021	0.00436776
ENSG00000102384	CENPI	-1.09689	5.67e-11
ENSG00000174371	EXO1	-1.09673	1.57e-11
ENSG00000100479	POLE2	-1.0965	5.73e-05
ENSG00000167900	TK1	-1.09226	2.17e-17
ENSG00000164237	CMBL	-1.09217	1.68e-17
ENSG00000135414	GDF11	-1.09126	3.99e-09
ENSG00000241388	HNF1A-AS1	-1.09041	6.13e-09
ENSG00000106351	AGFG2	-1.08716	9.03e-10
ENSG00000154914	USP43	-1.08407	0.00584665
ENSG00000105011	ASF1B	-1.08355	2.38e-11
ENSG00000166801	FAM111A	-1.07856	2.55e-12
ENSG00000066923	STAG3	-1.07512	3.71e-06
ENSG00000169683	LRRC45	-1.0724	2.13e-11
ENSG00000075945	KIFAP3	-1.07015	4.71e-13
ENSG00000065328	MCM10	-1.06721	4.57e-11
ENSG00000171320	ESCO2	-1.06615	2.62e-06
ENSG00000162636	FAM102B	-1.06256	8.85e-05
ENSG00000060566	CREB3L3	-1.05825	0.00366173
ENSG00000103018	CYB5B	-1.05771	6.39e-22
ENSG00000168646	AXIN2	-1.05517	6.08e-13
ENSG00000256618	MTRNR2L1	-1.05289	1.76e-06
ENSG00000158104	HPD	-1.05251	0.00226737
ENSG00000054654	SYNE2	-1.0511	3.05e-13
ENSG00000275661	AC004556.2	-1.05013	1.42e-07
ENSG00000130720	FIBCD1	-1.04762	0.000189239
ENSG00000100162	CENPM	-1.04503	5.98e-07
ENSG00000165443	PHYHIPL	-1.04339	4.26e-06
ENSG00000205213	LGR4	-1.03228	1.38e-10
ENSG00000179403	VWA1	-1.0298	4.61e-10
ENSG00000196730	DAPK1	-1.01828	0.00655687
ENSG00000182580	EPHB3	-1.01674	3.46e-05
ENSG00000104147	OIP5	-1.01235	5.59e-05
ENSG00000270617	URGCP-MRPS24	-1.01129	0.00740711
ENSG00000165240	ATP7A	-1.00872	0.00427154
ENSG00000101057	MYBL2	-1.0068	1.37e-21
ENSG00000127564	PKMYT1	-1.00177	1.34e-07
ENSG00000160298	C21orf58	-1.00041	0.00204771
