# Supplementary material for: Sustained activation of EGFR-ERK1/2 signaling limits the therapeutic response to tigecycline-induced inhibition of mitochondrial translation in liver cancer
Source: Research Square preprint supplement (doi:10.21203/rs.3.rs-1452915/v1), 2022-03-25
Supplement: Supplementary file 3 [file f816c494afbc3e30f124e9b6.xlsx]

## Sheet: Sheet1
Supplementary Table 6. List of differentially expressed genes (DEGs) of the tigecycline group versus control group in PLC/PRF/5 cells.
Gene ID	Gene Name	Log2fold change	P value
Upregulated genes (603)
ENSG00000073146	MOV10L1	7.88157	1.47e-07
ENSG00000257181	AC025423.4	7.68629	2.65e-06
ENSG00000233377	MTND4P20	7.68602	2.67e-06
ENSG00000250509	AC034213.1	7.66643	3.13e-06
ENSG00000049249	TNFRSF9	7.33724	1.48e-05
ENSG00000130487	KLHDC7B	7.31712	1.63e-11
ENSG00000264578	AC009630.3	7.19991	2.68e-05
ENSG00000146469	VIP	7.17298	3.17e-05
ENSG00000267049	AC002398.1	6.68697	0.000230788
ENSG00000124225	PMEPA1	6.6027	0.000340497
ENSG00000213860	RPL21P75	6.56095	0.000789087
ENSG00000240184	PCDHGC3	6.36675	0.000963936
ENSG00000169551	CT55	6.31455	0.00121769
ENSG00000134769	DTNA	6.28399	0.00012424
ENSG00000255498	AC068385.1	6.19915	0.00156777
ENSG00000138356	AOX1	6.14119	1.38e-07
ENSG00000170775	GPR37	6.08243	0.00236822
ENSG00000261914	RPL23AP84	6.01557	0.00273373
ENSG00000154319	FAM167A	5.9613	5.29e-07
ENSG00000150051	MKX	5.95371	0.0063748
ENSG00000224536	AC096677.1	5.95045	0.0034276
ENSG00000164742	ADCY1	5.84788	0.0006964
ENSG00000026025	VIM	5.64855	0.00281079
ENSG00000176971	FIBIN	5.63677	0.00114354
ENSG00000164778	EN2	5.57074	0.00119486
ENSG00000197177	ADGRA1	5.46962	0.00170699
ENSG00000153294	ADGRF4	5.29632	2.91e-07
ENSG00000105696	TMEM59L	5.20624	0.00380707
ENSG00000237149	ZNF503-AS2	5.16252	0.00418649
ENSG00000167767	KRT80	5.10013	1.1e-34
ENSG00000135480	KRT7	5.07112	1.55e-06
ENSG00000258583	LINC01500	5.02718	0.00687765
ENSG00000131711	MAP1B	4.97264	9.86e-49
ENSG00000137699	TRIM29	4.95436	1.18e-37
ENSG00000135842	NIBAN1	4.78617	5.56e-145
ENSG00000137868	STRA6	4.75303	0.0122153
ENSG00000155495	MAGEC1	4.70298	0.014049
ENSG00000242082	SLC5A4-AS1	4.69415	0.0141013
ENSG00000246985	SOCS2-AS1	4.64846	2.11e-10
ENSG00000137273	FOXF2	4.57458	0.000903625
ENSG00000180044	C3orf80	4.39953	0.00183379
ENSG00000138622	HCN4	4.39257	4.96e-12
ENSG00000106070	GRB10	4.38618	6.2e-50
ENSG00000143816	WNT9A	4.37477	0.00266998
ENSG00000282416	AC092299.1	4.29543	0.00337738
ENSG00000189269	DRICH1	4.21371	8.68e-05
ENSG00000130294	KIF1A	4.17565	7.44e-05
ENSG00000260566	AC127459.1	4.13265	0.000897104
ENSG00000026652	AGPAT4	4.07235	0.00125702
ENSG00000118263	KLF7	4.05733	0.00795046
ENSG00000214814	FER1L6	4.03654	3.08e-05
ENSG00000174171	AC020659.1	3.96912	0.00195919
ENSG00000187479	C11orf96	3.94532	6.09e-07
ENSG00000187720	THSD4	3.93669	3.5e-09
ENSG00000131196	NFATC1	3.90977	8.39e-05
ENSG00000116701	NCF2	3.90892	0.0121062
ENSG00000078018	MAP2	3.85779	0.00286008
ENSG00000168994	PXDC1	3.8366	4.75e-17
ENSG00000226312	CFLAR-AS1	3.82984	0.00377293
ENSG00000026559	KCNG1	3.8289	0.0162877
ENSG00000265190	ANXA8	3.78286	0.00338117
ENSG00000258285	TESC-AS1	3.73879	2.47e-07
ENSG00000135063	FAM189A2	3.71552	0.00177453
ENSG00000170500	LONRF2	3.68614	1.72e-13
ENSG00000236404	VLDLR-AS1	3.67637	4.35e-05
ENSG00000235899	LINC01564	3.65256	2.98e-05
ENSG00000163993	S100P	3.64866	7.77e-209
ENSG00000234068	PAGE2	3.61297	0.00640614
ENSG00000079689	SCGN	3.60532	3.64e-07
ENSG00000104177	MYEF2	3.5627	3.58e-11
ENSG00000259207	ITGB3	3.55756	0.00332592
ENSG00000124785	NRN1	3.51493	0.0124803
ENSG00000111799	COL12A1	3.48069	0.0123118
ENSG00000104112	SCG3	3.43243	0.000546427
ENSG00000264230	ANXA8L1	3.41649	0.00655553
ENSG00000137801	THBS1	3.41529	9.65e-07
ENSG00000183336	BOLA2	3.39275	0.00117005
ENSG00000225790	AC007953.1	3.3807	0.000259496
ENSG00000110025	SNX15	3.33038	3.62e-40
ENSG00000175920	DOK7	3.31914	6.7e-16
ENSG00000231948	HS1BP3-IT1	3.28532	0.00729953
ENSG00000196352	CD55	3.25903	4.13e-05
ENSG00000128342	LIF	3.24754	0.00339702
ENSG00000259867	AC105411.1	3.24002	0.00485002
ENSG00000232133	IMPDH1P10	3.22669	0.0131778
ENSG00000138109	CYP2C9	3.21625	4.35e-15
ENSG00000134470	IL15RA	3.2154	0.000401797
ENSG00000276850	AC245041.2	3.19528	5.22e-43
ENSG00000253227	AC090192.2	3.19221	8.82e-10
ENSG00000170689	HOXB9	3.19095	2.52e-28
ENSG00000196878	LAMB3	3.18838	1.22e-05
ENSG00000148468	FAM171A1	3.13707	0.000132882
ENSG00000176597	B3GNT5	3.12931	6.84e-07
ENSG00000133134	BEX2	3.12019	4.29e-68
ENSG00000139269	INHBE	3.08694	3.46e-259
ENSG00000232624	LINC01517	3.03278	5.1e-05
ENSG00000046774	MAGEC2	3.01271	2.82e-05
ENSG00000163083	INHBB	3.00108	1.31e-100
ENSG00000091656	ZFHX4	2.99776	0.00966307
ENSG00000128564	VGF	2.99366	0.00153918
ENSG00000167889	MGAT5B	2.98506	1.31e-10
ENSG00000205642	VCX3B	2.98316	0.00511324
ENSG00000115902	SLC1A4	2.98247	2.38e-102
ENSG00000173391	OLR1	2.96661	0.0111888
ENSG00000119771	KLHL29	2.96539	8.14e-07
ENSG00000171791	BCL2	2.95206	0.00153118
ENSG00000229656	ITGB1-DT	2.94396	4.59e-13
ENSG00000279872	AC006435.4	2.94232	0.00349037
ENSG00000186960	LINC01551	2.93798	2.19e-16
ENSG00000132031	MATN3	2.93171	0.00220932
ENSG00000269243	AC008894.2	2.91717	0.00179043
ENSG00000120833	SOCS2	2.90918	2.27e-30
ENSG00000116584	ARHGEF2	2.90271	6.25e-244
ENSG00000224599	BMS1P12	2.86983	0.00021074
ENSG00000114248	LRRC31	2.86393	1.83e-09
ENSG00000074527	NTN4	2.86016	2.03e-11
ENSG00000172361	CFAP53	2.85372	0.00484396
ENSG00000179546	HTR1D	2.84151	7.88e-06
ENSG00000078081	LAMP3	2.78262	1.72e-44
ENSG00000198796	ALPK2	2.77229	1.86e-14
ENSG00000073331	ALPK1	2.76634	9.97e-07
ENSG00000093134	VNN3	2.76144	0.00519018
ENSG00000259683	AC243562.2	2.74705	0.000182454
ENSG00000280800	FP671120.6	2.74684	0.00530839
ENSG00000101210	EEF1A2	2.74153	3.79e-08
ENSG00000087085	ACHE	2.7154	0.000126701
ENSG00000106948	AKNA	2.71122	3.37e-101
ENSG00000266933	AC005775.1	2.70496	0.00376524
ENSG00000146592	CREB5	2.66886	1.23e-07
ENSG00000185442	FAM174B	2.66305	0.00392892
ENSG00000178093	TSSK6	2.64933	0.000249664
ENSG00000164949	GEM	2.64886	8.92e-07
ENSG00000178695	KCTD12	2.63873	0.0153107
ENSG00000162772	ATF3	2.63086	2.91e-44
ENSG00000174951	FUT1	2.62538	1.34e-06
ENSG00000174564	IL20RB	2.60119	0.00923419
ENSG00000237988	OR2I1P	2.57889	6.83e-08
ENSG00000226652	PSMD10P2	2.57532	1.48e-08
ENSG00000177410	ZFAS1	2.56385	2.25e-247
ENSG00000135083	CCNJL	2.55795	4.36e-12
ENSG00000138772	ANXA3	2.55572	2.78e-81
ENSG00000175274	TP53I11	2.51875	0.00403068
ENSG00000074416	MGLL	2.49706	0.00123191
ENSG00000287796	AC016925.3	2.4923	1.72e-16
ENSG00000151917	BEND6	2.47065	0.00169894
ENSG00000236609	ZNF853	2.46468	0.00719154
ENSG00000162975	KCNF1	2.44054	1.82e-09
ENSG00000164379	FOXQ1	2.42709	1.8e-43
ENSG00000145920	CPLX2	2.42067	6.42e-05
ENSG00000165507	DEPP1	2.41772	1.76e-06
ENSG00000088826	SMOX	2.41236	1.17e-72
ENSG00000137819	PAQR5	2.4001	2.15e-12
ENSG00000248101	AC002116.1	2.39429	0.0051334
ENSG00000171617	ENC1	2.39024	0.0142603
ENSG00000231574	LINC02015	2.37913	1.39e-33
ENSG00000175592	FOSL1	2.37563	1.36e-05
ENSG00000101255	TRIB3	2.36981	9.06e-163
ENSG00000169429	CXCL8	2.35415	0
ENSG00000107731	UNC5B	2.34296	7.47e-12
ENSG00000069188	SDK2	2.32522	3.52e-28
ENSG00000251381	LINC00958	2.31693	0.00285698
ENSG00000162722	TRIM58	2.31488	0.0154571
ENSG00000079263	SP140	2.30828	0.00365133
ENSG00000188573	FBLL1	2.29785	0.000227246
ENSG00000117266	CDK18	2.28588	2e-11
ENSG00000197461	PDGFA	2.28095	1.27e-07
ENSG00000258555	SPECC1L-ADORA2A	2.26888	6.05e-08
ENSG00000125384	PTGER2	2.26754	0.0130453
ENSG00000135838	NPL	2.25425	0.00259943
ENSG00000091129	NRCAM	2.24207	0.0148198
ENSG00000224109	CENPVL3	2.22277	0.013123
ENSG00000189157	FAM47E	2.21919	0.00123755
ENSG00000261556	SMG1P7	2.21402	9.27e-05
ENSG00000162591	MEGF6	2.20673	9.64e-08
ENSG00000171234	UGT2B7	2.19949	0.0039789
ENSG00000111181	SLC6A12	2.19887	1.3e-14
ENSG00000179431	FJX1	2.18946	4.8e-07
ENSG00000285294	LINC00842	2.17546	0.00382897
ENSG00000180801	ARSJ	2.17541	4.24e-05
ENSG00000181649	PHLDA2	2.15442	1.38e-14
ENSG00000083720	OXCT1	2.15388	0.00653588
ENSG00000186019	AC021092.1	2.13894	0.00634094
ENSG00000087074	PPP1R15A	2.13131	1.4e-54
ENSG00000136826	KLF4	2.12887	6.28e-30
ENSG00000196924	FLNA	2.12387	3.43e-175
ENSG00000156510	HKDC1	2.11629	4.4e-97
ENSG00000223812	AC073365.1	2.11213	0.00605625
ENSG00000176092	CRYBG2	2.11078	1.41e-42
ENSG00000008517	IL32	2.10947	6.64e-112
ENSG00000229256	ST13P13	2.09429	2.58e-06
ENSG00000153132	CLGN	2.09368	3.12e-96
ENSG00000115963	RND3	2.09288	5.23e-15
ENSG00000067057	PFKP	2.0824	4.49e-06
ENSG00000145911	N4BP3	2.07888	1.62e-08
ENSG00000256087	ZNF432	2.0757	4.7e-13
ENSG00000184735	DDX53	2.0722	1.12e-05
ENSG00000158825	CDA	2.06028	4.21e-08
ENSG00000196954	CASP4	2.05394	7.05e-17
ENSG00000166401	SERPINB8	2.04526	2.38e-23
ENSG00000204387	SNHG32	2.04377	6.79e-71
ENSG00000261342	AC006538.1	2.03321	0.000505274
ENSG00000138119	MYOF	2.03051	4.13e-65
ENSG00000073849	ST6GAL1	2.02209	1.88e-06
ENSG00000197928	ZNF677	2.01999	0.00129722
ENSG00000274414	AL121772.1	2.01265	5.25e-05
ENSG00000116254	CHD5	2.00979	0.00116641
ENSG00000087266	SH3BP2	1.99707	8.8e-24
ENSG00000140044	JDP2	1.9912	8.4e-18
ENSG00000184788	SATL1	1.99014	0.000880189
ENSG00000267120	AD000671.2	1.98901	8.33e-08
ENSG00000035862	TIMP2	1.98813	1.53e-17
ENSG00000219891	ZSCAN12P1	1.98758	0.00368115
ENSG00000230647	AC022816.1	1.97504	0.00500256
ENSG00000196154	S100A4	1.97228	0.00191698
ENSG00000137285	TUBB2B	1.9703	1.33e-50
ENSG00000053747	LAMA3	1.96575	2.23e-31
ENSG00000129988	LBP	1.96158	0.00729262
ENSG00000278817	AC007325.4	1.94776	0.00216212
ENSG00000158023	CFAP251	1.94234	0.000670143
ENSG00000166173	LARP6	1.93875	8.59e-39
ENSG00000227449	FGF7P6	1.92841	9.19e-05
ENSG00000026508	CD44	1.92774	0.00110761
ENSG00000169918	OTUD7A	1.92757	0.0145103
ENSG00000168528	SERINC2	1.9028	7.97e-42
ENSG00000182379	NXPH4	1.90202	0.00093693
ENSG00000147883	CDKN2B	1.89854	1.32e-06
ENSG00000176438	SYNE3	1.88693	0.00855421
ENSG00000070404	FSTL3	1.88403	1.27e-39
ENSG00000166833	NAV2	1.88313	3.55e-69
ENSG00000085662	AKR1B1	1.87978	2.78e-88
ENSG00000198788	MUC2	1.87578	2.1e-15
ENSG00000128266	GNAZ	1.87185	9.31e-05
ENSG00000233024	NPIPA9	1.86955	5.99e-10
ENSG00000063660	GPC1	1.84682	6.35e-23
ENSG00000112096	SOD2	1.84543	5.06e-210
ENSG00000103034	NDRG4	1.84186	4.87e-08
ENSG00000103257	SLC7A5	1.83241	2.92e-149
ENSG00000196517	SLC6A9	1.83177	2.15e-27
ENSG00000272620	AFAP1-AS1	1.82738	0.00825955
ENSG00000022267	FHL1	1.82492	6.33e-30
ENSG00000279641	AC120057.3	1.81849	0.00464472
ENSG00000006652	IFRD1	1.81469	4.64e-98
ENSG00000159176	CSRP1	1.81466	1.15e-41
ENSG00000188629	ZNF177	1.81093	0.00119242
ENSG00000168003	SLC3A2	1.79595	1.63e-20
ENSG00000065320	NTN1	1.7936	0.00194642
ENSG00000270882	H4C14	1.78974	0.00445049
ENSG00000243910	TUBA4B	1.7891	0.00617394
ENSG00000234745	HLA-B	1.78522	4.49e-23
ENSG00000171310	CHST11	1.77964	0.00602601
ENSG00000186197	EDARADD	1.77733	1.24e-13
ENSG00000266094	RASSF5	1.77719	2.41e-05
ENSG00000100994	PYGB	1.77201	5.6e-135
ENSG00000235961	PNMA6A	1.76864	2.05e-05
ENSG00000163472	TMEM79	1.76657	1.96e-11
ENSG00000269893	SNHG8	1.76601	1.37e-39
ENSG00000116717	GADD45A	1.76135	5.26e-21
ENSG00000135269	TES	1.75127	2.76e-90
ENSG00000160161	CILP2	1.74128	0.00933551
ENSG00000164251	F2RL1	1.73929	4.52e-09
ENSG00000285051	SLC7A14-AS1	1.73729	0.0150583
ENSG00000105499	PLA2G4C	1.73283	1.3e-12
ENSG00000132205	EMILIN2	1.72966	1.38e-21
ENSG00000173210	ABLIM3	1.72451	2.16e-40
ENSG00000010219	DYRK4	1.71518	6.3e-05
ENSG00000115919	KYNU	1.70542	1.09e-26
ENSG00000151632	AKR1C2	1.70463	5.14e-147
ENSG00000178381	ZFAND2A	1.70343	1.98e-28
ENSG00000136010	ALDH1L2	1.70285	3.02e-51
ENSG00000103723	AP3B2	1.69918	4.49e-13
ENSG00000187243	MAGED4B	1.69486	1.55e-06
ENSG00000003147	ICA1	1.68453	0.00584139
ENSG00000288640	AC005192.1	1.67936	3.49e-20
ENSG00000224321	RPL12P14	1.67886	7.32e-19
ENSG00000213886	UBD	1.67587	2.15e-20
ENSG00000170417	TMEM182	1.67296	1.66e-09
ENSG00000234665	LERFS	1.67211	2.67e-14
ENSG00000140105	WARS1	1.66969	7.53e-155
ENSG00000188549	CCDC9B	1.66623	2.77e-21
ENSG00000154274	C4orf19	1.66569	0.00653187
ENSG00000099812	MISP	1.66232	2.2e-32
ENSG00000177606	JUN	1.6594	3.32e-56
ENSG00000118503	TNFAIP3	1.65562	9.91e-30
ENSG00000175197	DDIT3	1.65218	5.46e-39
ENSG00000262172	AC116025.2	1.64691	0.000151665
ENSG00000236423	LINC01134	1.64011	0.00553178
ENSG00000010404	IDS	1.63912	9.56e-40
ENSG00000169621	APLF	1.63626	0.00172168
ENSG00000010810	FYN	1.63042	0.00149676
ENSG00000120875	DUSP4	1.62918	8.14e-19
ENSG00000272968	RBAK-RBAKDN	1.62725	6.18e-14
ENSG00000234741	GAS5	1.62415	1.81e-78
ENSG00000109944	JHY	1.6206	0.0103926
ENSG00000213185	FAM24B	1.61734	0.000289733
ENSG00000272079	AC004233.2	1.61434	2.58e-09
ENSG00000135046	ANXA1	1.60804	7.38e-09
ENSG00000172380	GNG12	1.60515	0.010668
ENSG00000159403	C1R	1.60353	0.00345175
ENSG00000116852	KIF21B	1.60189	1.74e-53
ENSG00000158887	MPZ	1.59356	0.00017157
ENSG00000134070	IRAK2	1.5915	6.71e-46
ENSG00000089820	ARHGAP4	1.59055	0.000199864
ENSG00000248538	AC022784.1	1.58782	0.00929594
ENSG00000152137	HSPB8	1.57808	1.64e-16
ENSG00000268621	IGFL2-AS1	1.57663	1.78e-07
ENSG00000129474	AJUBA	1.57408	6.06e-86
ENSG00000165929	TC2N	1.56668	0.00179602
ENSG00000185519	FAM131C	1.55619	0.00016811
ENSG00000262001	DLGAP1-AS2	1.55484	1.08e-17
ENSG00000147174	GCNA	1.54833	0.000232987
ENSG00000166199	ALKBH3	1.54296	5.62e-25
ENSG00000156006	NAT2	1.53416	0.0010505
ENSG00000041353	RAB27B	1.53214	5.64e-29
ENSG00000138166	DUSP5	1.52802	1.76e-25
ENSG00000261759	AC099518.5	1.52718	1.76e-06
ENSG00000180611	MB21D2	1.52697	6.9e-15
ENSG00000125845	BMP2	1.51951	5.88e-12
ENSG00000109072	VTN	1.51814	3.06e-141
ENSG00000111981	ULBP1	1.51343	1.77e-07
ENSG00000262633	AC005670.2	1.50315	0.00916889
ENSG00000013619	MAMLD1	1.49428	0.000192697
ENSG00000105963	ADAP1	1.49218	1.49e-05
ENSG00000128918	ALDH1A2	1.48969	1.16e-07
ENSG00000276980	AC008760.2	1.48676	0.00184256
ENSG00000083817	ZNF416	1.48578	4.04e-06
ENSG00000225177	AL590617.2	1.48512	4.38e-06
ENSG00000135919	SERPINE2	1.47867	3.15e-10
ENSG00000277938	AL035252.3	1.47263	0.00216488
ENSG00000175061	SNHG29	1.47176	5.98e-97
ENSG00000228526	MIR34AHG	1.46801	0.000159729
ENSG00000148798	INA	1.46153	1e-11
ENSG00000142798	HSPG2	1.45762	6.45e-58
ENSG00000113739	STC2	1.45473	5.84e-130
ENSG00000148677	ANKRD1	1.45139	5.94e-34
ENSG00000167995	BEST1	1.44941	1.57e-05
ENSG00000075407	ZNF37A	1.44927	0.00715915
ENSG00000255501	CARD18	1.44783	0.00446613
ENSG00000143878	RHOB	1.44758	3.87e-48
ENSG00000035664	DAPK2	1.44389	4.77e-05
ENSG00000205810	KLRC3	1.44281	5.16e-07
ENSG00000175806	MSRA	1.43926	0.00440127
ENSG00000138131	LOXL4	1.43751	6.04e-86
ENSG00000142871	CCN1	1.43697	1.26e-90
ENSG00000262712	AC012676.1	1.43657	0.000745168
ENSG00000269586	CT45A10	1.43631	0.00101716
ENSG00000225648	SBDSP1	1.43525	4.07e-33
ENSG00000120708	TGFBI	1.43502	5.07e-107
ENSG00000229314	ORM1	1.43446	6.16e-10
ENSG00000256971	LINC00508	1.43352	1.29e-15
ENSG00000250067	YJEFN3	1.42975	0.00471355
ENSG00000215190	LINC00680	1.42536	2.67e-05
ENSG00000189143	CLDN4	1.42505	0.0107903
ENSG00000188599	NPIPP1	1.4237	2.52e-06
ENSG00000231274	SBK3	1.42126	0.000887279
ENSG00000167191	GPRC5B	1.41574	1.23e-06
ENSG00000173334	TRIB1	1.41453	1.14e-27
ENSG00000187134	AKR1C1	1.41266	2.3e-100
ENSG00000261600	AC233266.2	1.41118	0.00296748
ENSG00000284634	AC092821.3	1.40913	0.000199599
ENSG00000002822	MAD1L1	1.40785	3.26e-05
ENSG00000239467	AC007405.3	1.40304	6.29e-09
ENSG00000130766	SESN2	1.39812	1.4e-51
ENSG00000118096	IFT46	1.39396	0.000309374
ENSG00000186162	CIDECP1	1.39317	6.25e-10
ENSG00000221968	FADS3	1.39166	7.15e-28
ENSG00000125398	SOX9	1.39058	1.07e-23
ENSG00000102109	PCSK1N	1.38595	3.03e-30
ENSG00000105974	CAV1	1.38018	2.06e-07
ENSG00000124145	SDC4	1.37765	7.45e-48
ENSG00000140465	CYP1A1	1.37697	1.64e-45
ENSG00000102359	SRPX2	1.37537	3.15e-06
ENSG00000170537	TMC7	1.37187	6.77e-19
ENSG00000150782	IL18	1.37141	1.96e-62
ENSG00000164930	FZD6	1.37054	0.000677886
ENSG00000068028	RASSF1	1.36595	3.03e-23
ENSG00000219438	TAFA5	1.36405	1.07e-17
ENSG00000196660	SLC30A10	1.36378	2.37e-15
ENSG00000179562	GCC1	1.357	2.02e-28
ENSG00000172432	GTPBP2	1.35125	1.41e-64
ENSG00000213977	TAX1BP3	1.35063	5.14e-23
ENSG00000100234	TIMP3	1.34596	1.9e-09
ENSG00000267022	AC067968.1	1.34176	0.00263894
ENSG00000163131	CTSS	1.34102	2.31e-05
ENSG00000203875	SNHG5	1.33999	2.57e-31
ENSG00000077150	NFKB2	1.33902	3.39e-61
ENSG00000280441	FP236383.3	1.33758	0.00117336
ENSG00000259607	AC108449.3	1.33308	0.0010297
ENSG00000150687	PRSS23	1.33176	1.26e-09
ENSG00000179104	TMTC2	1.32928	0.00309216
ENSG00000187840	EIF4EBP1	1.32613	7.91e-74
ENSG00000188643	S100A16	1.3218	3.71e-74
ENSG00000205363	INSYN1	1.31714	0.00755219
ENSG00000145908	ZNF300	1.31628	2.23e-06
ENSG00000225972	MTND1P23	1.31325	1.42e-57
ENSG00000167996	FTH1	1.31077	9.27e-163
ENSG00000125726	CD70	1.30734	2.62e-20
ENSG00000128203	ASPHD2	1.30683	0.0124022
ENSG00000142627	EPHA2	1.30465	3.52e-36
ENSG00000122012	SV2C	1.30345	0.000954996
ENSG00000152315	KCNK13	1.30266	0.000714648
ENSG00000240230	COX19	1.30179	1.71e-14
ENSG00000155265	GOLGA7B	1.30019	1.94e-07
ENSG00000187735	TCEA1	1.29342	1.58e-73
ENSG00000154065	ANKRD29	1.28877	5.06e-17
ENSG00000128965	CHAC1	1.28839	5.59e-45
ENSG00000133816	MICAL2	1.28786	2.66e-16
ENSG00000163975	MELTF	1.28761	2.2e-22
ENSG00000135069	PSAT1	1.28546	3.8e-89
ENSG00000153714	LURAP1L	1.27939	6.39e-09
ENSG00000177685	CRACR2B	1.27927	1.89e-06
ENSG00000283496	ZNF511-PRAP1	1.27919	0.0108512
ENSG00000236345	SCAT8	1.27797	3.66e-05
ENSG00000173705	SUSD5	1.27531	1.75e-09
ENSG00000133985	TTC9	1.27448	3.7e-05
ENSG00000093100	AC016026.1	1.27446	9.37e-10
ENSG00000076716	GPC4	1.27239	0.00244354
ENSG00000259357	AL590133.2	1.27214	0.0122657
ENSG00000198517	MAFK	1.27161	3.15e-47
ENSG00000075643	MOCOS	1.27032	5.17e-34
ENSG00000115107	STEAP3	1.26892	1.57e-08
ENSG00000174428	GTF2IRD2B	1.26852	0.00591718
ENSG00000118257	NRP2	1.26736	1.75e-17
ENSG00000149591	TAGLN	1.26616	9.43e-05
ENSG00000152527	PLEKHH2	1.26151	1.44e-16
ENSG00000100139	MICALL1	1.25834	1.38e-23
ENSG00000062282	DGAT2	1.25381	0.00782838
ENSG00000052749	RRP12	1.25299	1.59e-36
ENSG00000176788	BASP1	1.25255	0.00480506
ENSG00000244165	P2RY11	1.24984	1.82e-05
ENSG00000197063	MAFG	1.24781	3.65e-13
ENSG00000221890	NPTXR	1.24713	0.00237204
ENSG00000006327	TNFRSF12A	1.24561	7.89e-58
ENSG00000104825	NFKBIB	1.24465	3.08e-26
ENSG00000176473	WDR25	1.24448	2.44e-05
ENSG00000163545	NUAK2	1.2421	6.74e-15
ENSG00000257636	G2E3-AS1	1.23304	0.0155454
ENSG00000214940	NPIPA8	1.23166	0.00753963
ENSG00000198380	GFPT1	1.22904	9.61e-69
ENSG00000167747	C19orf48	1.22687	2.68e-36
ENSG00000106305	AIMP2	1.22216	2.37e-22
ENSG00000057593	F7	1.21935	1.97e-10
ENSG00000264247	LINC00909	1.21529	8.52e-06
ENSG00000143507	DUSP10	1.21314	0.000288693
ENSG00000173918	C1QTNF1	1.20627	3.63e-15
ENSG00000147642	SYBU	1.20562	0.000240228
ENSG00000078401	EDN1	1.20478	4.81e-05
ENSG00000112183	RBM24	1.20464	5.18e-14
ENSG00000176046	NUPR1	1.2043	8.74e-78
ENSG00000163584	RPL22L1	1.20416	8.72e-34
ENSG00000110436	SLC1A2	1.19563	0.00349697
ENSG00000183793	NPIPA5	1.19315	6.26e-08
ENSG00000279364	AC114546.3	1.19226	3.78e-11
ENSG00000163874	ZC3H12A	1.19122	2.41e-09
ENSG00000260136	AC008915.3	1.19103	0.000829237
ENSG00000172216	CEBPB	1.18558	5.41e-07
ENSG00000184903	IMMP2L	1.18522	0.0107628
ENSG00000159840	ZYX	1.18501	4.69e-20
ENSG00000267260	AC020928.1	1.18369	8.07e-05
ENSG00000272617	AC026464.6	1.18271	0.00134735
ENSG00000137720	C11orf1	1.18097	4.71e-06
ENSG00000189060	H1-0	1.1808	1.42e-53
ENSG00000260920	AL031985.3	1.17904	4.08e-18
ENSG00000235890	TSPEAR-AS1	1.1777	2.5e-05
ENSG00000184371	CSF1	1.17744	3.75e-19
ENSG00000198223	CSF2RA	1.17529	2.08e-05
ENSG00000198832	SELENOM	1.17276	1.64e-38
ENSG00000162458	FBLIM1	1.17269	2.18e-13
ENSG00000183570	PCBP3	1.17152	0.00781067
ENSG00000259661	AC068831.3	1.16977	1.82e-06
ENSG00000100814	CCNB1IP1	1.16457	2.96e-31
ENSG00000265818	EEF1E1-BLOC1S5	1.15812	1.14e-05
ENSG00000188191	PRKAR1B	1.1577	1.8e-09
ENSG00000123243	ITIH5	1.15642	4.05e-12
ENSG00000169857	AVEN	1.15599	7.59e-08
ENSG00000125826	RBCK1	1.1556	3.47e-28
ENSG00000197943	PLCG2	1.15475	0.000790033
ENSG00000182600	SNORC	1.15237	8.29e-06
ENSG00000234678	ELF3-AS1	1.15214	2.71e-12
ENSG00000171492	LRRC8D	1.15155	1.83e-38
ENSG00000092621	PHGDH	1.15128	5.35e-77
ENSG00000107223	EDF1	1.15027	3.82e-76
ENSG00000070669	ASNS	1.1484	1.3e-65
ENSG00000165030	NFIL3	1.14794	2.11e-27
ENSG00000145990	GFOD1	1.14777	0.000457976
ENSG00000113645	WWC1	1.14684	1.03e-45
ENSG00000130768	SMPDL3B	1.14632	0.00783015
ENSG00000015475	BID	1.14044	0.000424518
ENSG00000158710	TAGLN2	1.13773	9.76e-48
ENSG00000254166	CASC19	1.13766	7.37e-27
ENSG00000143353	LYPLAL1	1.13722	4.59e-07
ENSG00000124882	EREG	1.13603	2.45e-55
ENSG00000146232	NFKBIE	1.13371	5.19e-14
ENSG00000133398	MED10	1.13134	1.49e-14
ENSG00000115009	CCL20	1.12478	2.84e-42
ENSG00000109321	AREG	1.12471	2.84e-34
ENSG00000110619	CARS1	1.1243	4.96e-62
ENSG00000267254	ZNF790-AS1	1.12055	1.08e-07
ENSG00000153029	MR1	1.1196	4.2e-07
ENSG00000196935	SRGAP1	1.11935	1.38e-16
ENSG00000167657	DAPK3	1.11772	2.81e-18
ENSG00000125730	C3	1.11548	2.49e-85
ENSG00000198888	MT-ND1	1.11287	4.06e-70
ENSG00000198393	ZNF26	1.11187	2.79e-07
ENSG00000179241	LDLRAD3	1.11165	1.38e-05
ENSG00000240356	RPL23AP7	1.11148	0.000154116
ENSG00000109667	SLC2A9	1.11095	1.06e-05
ENSG00000109220	CHIC2	1.10994	8.19e-06
ENSG00000129646	QRICH2	1.10717	0.00396431
ENSG00000135052	GOLM1	1.10668	1.3e-33
ENSG00000162645	GBP2	1.10412	3.18e-23
ENSG00000163156	SCNM1	1.10293	1.9e-13
ENSG00000078487	ZCWPW1	1.10178	0.000565778
ENSG00000204514	ZNF814	1.10152	0.0019276
ENSG00000162734	PEA15	1.10146	2.78e-31
ENSG00000166261	ZNF202	1.1002	3.61e-08
ENSG00000235609	AF127577.4	1.1001	0.00367027
ENSG00000148841	ITPRIP	1.09982	9.93e-08
ENSG00000107562	CXCL12	1.09937	2.54e-59
ENSG00000110013	SIAE	1.09785	3.27e-06
ENSG00000225630	MTND2P28	1.09688	0.00189583
ENSG00000147852	VLDLR	1.09674	1.55e-20
ENSG00000183426	NPIPA1	1.09514	8.65e-15
ENSG00000080031	PTPRH	1.09445	1.41e-11
ENSG00000128274	A4GALT	1.0936	0.000483507
ENSG00000147118	ZNF182	1.09359	0.000206742
ENSG00000092607	TBX15	1.09228	6.05e-07
ENSG00000118804	STBD1	1.09216	3.71e-16
ENSG00000096433	ITPR3	1.0903	1.05e-19
ENSG00000180346	TIGD2	1.08837	2.9e-07
ENSG00000286125	AC006115.2	1.0856	0.000572648
ENSG00000140961	OSGIN1	1.08475	9.65e-07
ENSG00000175701	MTLN	1.08384	5.4e-06
ENSG00000074935	TUBE1	1.08211	1.91e-24
ENSG00000143013	LMO4	1.08145	1.62e-29
ENSG00000031698	SARS1	1.08048	2.7e-86
ENSG00000259132	AL132780.3	1.0784	0.000639814
ENSG00000173226	IQCB1	1.07802	1.21e-16
ENSG00000182768	NGRN	1.07747	3.72e-66
ENSG00000173812	EIF1	1.07582	3.33e-66
ENSG00000170390	DCLK2	1.07579	0.0137903
ENSG00000106105	GARS1	1.07525	2.87e-89
ENSG00000132326	PER2	1.0747	1.61e-05
ENSG00000181885	CLDN7	1.07131	6.25e-06
ENSG00000008513	ST3GAL1	1.0679	0.000783676
ENSG00000271949	AC093423.3	1.06607	0.00129119
ENSG00000197822	OCLN	1.06576	1.26e-26
ENSG00000161714	PLCD3	1.06428	9.4e-19
ENSG00000003137	CYP26B1	1.06389	0.00245879
ENSG00000104856	RELB	1.06274	1.5e-12
ENSG00000038532	CLEC16A	1.06246	2.21e-13
ENSG00000143256	PFDN2	1.06192	4.13e-20
ENSG00000064199	SPA17	1.0611	0.0149184
ENSG00000108797	CNTNAP1	1.05988	0.000407961
ENSG00000161265	U2AF1L4	1.05884	3.54e-07
ENSG00000182199	SHMT2	1.05342	7.43e-62
ENSG00000286156	AC026273.1	1.05278	3.65e-05
ENSG00000251192	ZNF674	1.052	3.64e-05
ENSG00000166780	BMERB1	1.04939	5.1e-07
ENSG00000128165	ADM2	1.04903	1.21e-12
ENSG00000154309	DISP1	1.04537	2.68e-08
ENSG00000152291	TGOLN2	1.04417	8.1e-63
ENSG00000248498	ASNSP1	1.04331	4.41e-08
ENSG00000173276	ZBTB21	1.04257	1.34e-11
ENSG00000196781	TLE1	1.04218	1.29e-28
ENSG00000130054	FAM155B	1.04143	3.11e-10
ENSG00000130830	MPP1	1.03974	3.28e-08
ENSG00000104907	TRMT1	1.03939	1.55e-22
ENSG00000115306	SPTBN1	1.03503	5.16e-47
ENSG00000204837	FGF7P3	1.03245	0.000389097
ENSG00000196387	ZNF140	1.03175	1.67e-06
ENSG00000241316	SUCLG2-AS1	1.03094	0.0146585
ENSG00000254681	PKD1P5	1.02972	6.36e-24
ENSG00000124920	MYRF	1.02765	8.09e-44
ENSG00000241506	PSMC1P1	1.02731	0.0041981
ENSG00000184056	VPS33B	1.02662	8.86e-08
ENSG00000144161	ZC3H8	1.02514	3.25e-10
ENSG00000128656	CHN1	1.02418	1.58e-09
ENSG00000240024	LINC00888	1.02361	0.000275959
ENSG00000152229	PSTPIP2	1.02336	5.97e-05
ENSG00000186529	CYP4F3	1.0228	9.64e-24
ENSG00000163069	SGCB	1.02037	0.00020048
ENSG00000132570	PCBD2	1.01875	0.000712871
ENSG00000198496	NBR2	1.01733	6.18e-13
ENSG00000171867	PRNP	1.01639	3.79e-42
ENSG00000183696	UPP1	1.01601	4.08e-20
ENSG00000168487	BMP1	1.01412	8.4e-08
ENSG00000176845	METRNL	1.01272	0.0136086
ENSG00000068024	HDAC4	1.0122	0.00783944
ENSG00000065911	MTHFD2	1.0117	1.2e-45
ENSG00000170921	TANC2	1.01014	4.28e-15
ENSG00000171992	SYNPO	1.00904	1.36e-15
ENSG00000198763	MT-ND2	1.00884	8.95e-11
ENSG00000111012	CYP27B1	1.00874	0.00112387
ENSG00000167552	TUBA1A	1.00848	5.84e-06
ENSG00000090020	SLC9A1	1.00825	4.8e-09
ENSG00000102103	PQBP1	1.00637	1.56e-19
ENSG00000103966	EHD4	1.00578	1.49e-30
ENSG00000108961	RANGRF	1.00576	5.1e-10
ENSG00000181894	ZNF329	1.0051	2.1e-06
ENSG00000151353	TMEM18	1.00431	1.38e-05
ENSG00000233444	AC013262.1	1.00394	0.000152864
ENSG00000285509	TBCEL-TECTA	1.00372	0.00240749
ENSG00000137821	LRRC49	1.00256	4.41e-05
Downregulated genes (574)
ENSG00000153902	LGI4	-8.98265	3.43e-09
ENSG00000137628	DDX60	-7.59567	5.33e-07
ENSG00000265690	AC074143.1	-7.04299	5.15e-05
ENSG00000231453	LINC01305	-6.41977	0.000524622
ENSG00000174992	ZG16	-6.28985	0.000878992
ENSG00000283534	MIR374C	-6.15831	0.00207943
ENSG00000130303	BST2	-5.97871	0.00255546
ENSG00000211452	DIO1	-5.92913	0.0034434
ENSG00000250349	AF241726.2	-5.92395	0.00319626
ENSG00000262304	AC027796.3	-5.91878	0.00308172
ENSG00000254198	AC113191.1	-5.84547	0.00390475
ENSG00000280177	AC004408.2	-5.83449	0.00472143
ENSG00000111335	OAS2	-5.80741	1.01e-06
ENSG00000185745	IFIT1	-5.72376	8.65e-204
ENSG00000128242	GAL3ST1	-5.54219	1.08e-10
ENSG00000263424	AC110597.3	-5.47519	0.00149587
ENSG00000196302	AC146944.1	-5.26285	0.00323585
ENSG00000257660	ADCY6-DT	-4.77332	0.0125434
ENSG00000243566	UPK3B	-4.63805	0.014765
ENSG00000165617	DACT1	-4.61798	2.56e-11
ENSG00000070915	SLC12A3	-4.5838	0.000799967
ENSG00000248144	ADH1C	-4.27733	1.7e-07
ENSG00000185002	RFX6	-4.09858	9.4e-06
ENSG00000249464	LINC01091	-4.02646	0.0010993
ENSG00000143627	PKLR	-3.94742	7.75e-06
ENSG00000183888	SRARP	-3.80383	2.17e-13
ENSG00000286408	AC113410.4	-3.79692	0.0127594
ENSG00000287093	AC003093.1	-3.7942	0.00328372
ENSG00000244062	AC080128.1	-3.73158	0.00427059
ENSG00000163586	FABP1	-3.68301	8.86e-13
ENSG00000253948	VPS13B-DT	-3.6435	6.38e-05
ENSG00000107159	CA9	-3.60557	1.93e-08
ENSG00000135094	SDS	-3.5891	2.48e-06
ENSG00000169507	SLC38A11	-3.56448	0.000421013
ENSG00000172137	CALB2	-3.55734	1.29e-07
ENSG00000112486	CCR6	-3.55286	0.00658252
ENSG00000153993	SEMA3D	-3.54102	2.48e-80
ENSG00000130600	H19	-3.50281	1.66e-73
ENSG00000156076	WIF1	-3.48654	1.55e-08
ENSG00000229862	AL121972.1	-3.47668	1.12e-18
ENSG00000109107	ALDOC	-3.43967	0.000113671
ENSG00000184226	PCDH9	-3.31964	3.82e-132
ENSG00000287555	AC023424.2	-3.31012	0.00504097
ENSG00000275661	AC004556.2	-3.26087	9.06e-15
ENSG00000164188	RANBP3L	-3.25877	8.68e-05
ENSG00000187688	TRPV2	-3.23624	0.00102579
ENSG00000109193	SULT1E1	-3.23378	8.76e-05
ENSG00000286053	ASDURF	-3.20647	0.00544879
ENSG00000235023	AP001626.1	-3.20303	0.00887327
ENSG00000260285	AL133367.1	-3.18042	0.000242272
ENSG00000135114	OASL	-3.17353	3.67e-17
ENSG00000089356	FXYD3	-3.16623	0.00995401
ENSG00000274525	AC008443.6	-3.09199	1.72e-05
ENSG00000285542	AC013717.1	-3.08741	0.00162526
ENSG00000187608	ISG15	-3.04561	0
ENSG00000280048	AC012409.5	-3.03514	0.00135739
ENSG00000107984	DKK1	-3.02089	0.00015278
ENSG00000167964	RAB26	-3.02069	9.82e-07
ENSG00000001626	CFTR	-3.01877	0.00300609
ENSG00000242193	CRYZL2P	-3.00855	1.01e-08
ENSG00000177984	LCN15	-3.00024	1.31e-17
ENSG00000113889	KNG1	-2.9862	1.67e-52
ENSG00000257242	LINC01619	-2.96711	0.000683844
ENSG00000185008	ROBO2	-2.93509	8.16e-24
ENSG00000143847	PPFIA4	-2.91409	0.00310994
ENSG00000246145	RRS1-AS1	-2.88196	0.0125396
ENSG00000084110	HAL	-2.86357	7e-15
ENSG00000135346	CGA	-2.84841	1.55e-37
ENSG00000167711	SERPINF2	-2.84439	3.38e-52
ENSG00000161267	BDH1	-2.83949	0.00213009
ENSG00000196542	SPTSSB	-2.83284	5.64e-10
ENSG00000134326	CMPK2	-2.83045	0.0101986
ENSG00000196604	POTEF	-2.81596	1.63e-05
ENSG00000146411	SLC2A12	-2.80041	2.73e-16
ENSG00000253598	SLC10A5	-2.77868	0.00104695
ENSG00000135333	EPHA7	-2.77067	4.67e-59
ENSG00000174473	GALNTL6	-2.74221	0.00363501
ENSG00000172794	RAB37	-2.74085	3.44e-19
ENSG00000229140	CCDC26	-2.73456	0.0129415
ENSG00000124568	SLC17A1	-2.7233	6.16e-05
ENSG00000255794	RMST	-2.72127	0.00774351
ENSG00000081051	AFP	-2.69999	2.76e-29
ENSG00000170099	SERPINA6	-2.69393	6.63e-102
ENSG00000166165	CKB	-2.69159	2.31e-176
ENSG00000204709	LINC01556	-2.67927	0.0123621
ENSG00000187017	ESPN	-2.669	0.000316434
ENSG00000116983	HPCAL4	-2.65626	0.00240413
ENSG00000246350	AL049543.1	-2.6534	0.0162301
ENSG00000088340	FER1L4	-2.64078	7.32e-10
ENSG00000005844	ITGAL	-2.6265	1.19e-22
ENSG00000153234	NR4A2	-2.61926	1.57e-71
ENSG00000129654	FOXJ1	-2.57313	0.00156333
ENSG00000204444	APOM	-2.56854	1.82e-28
ENSG00000004799	PDK4	-2.52596	3.06e-36
ENSG00000104419	NDRG1	-2.51701	8.96e-38
ENSG00000186994	KANK3	-2.51248	0.000477715
ENSG00000135312	HTR1B	-2.48849	3.34e-07
ENSG00000124564	SLC17A3	-2.45563	0.000588872
ENSG00000287951	AC026402.2	-2.45329	0.0011626
ENSG00000171227	TMEM37	-2.4524	8.71e-10
ENSG00000130270	ATP8B3	-2.45085	0.000442788
ENSG00000228544	CCDC183-AS1	-2.42289	8.02e-32
ENSG00000287683	AL591519.1	-2.41798	0.0107622
ENSG00000273066	AL355987.4	-2.41328	4.5e-23
ENSG00000231160	KLF3-AS1	-2.41218	0.0112845
ENSG00000242574	HLA-DMB	-2.38678	9.03e-10
ENSG00000236519	LINC01424	-2.38245	0.00194974
ENSG00000134532	SOX5	-2.37434	8.85e-12
ENSG00000283078	AL137077.2	-2.36079	0.00796237
ENSG00000158856	DMTN	-2.3553	1.46e-05
ENSG00000089127	OAS1	-2.34878	9.47e-27
ENSG00000173213	TUBB8B	-2.34665	7.16e-07
ENSG00000264943	SH3GL1P2	-2.34609	0.00118959
ENSG00000166963	MAP1A	-2.34526	0.00486412
ENSG00000049089	COL9A2	-2.33563	0.00346254
ENSG00000230084	AC006059.1	-2.33006	0.000753218
ENSG00000262877	AC110285.2	-2.32996	9.67e-12
ENSG00000138496	PARP9	-2.3176	2.11e-29
ENSG00000147573	TRIM55	-2.31174	0.00957126
ENSG00000119917	IFIT3	-2.29499	0.000539701
ENSG00000183091	NEB	-2.29197	3.18e-14
ENSG00000130589	HELZ2	-2.29125	2.24e-111
ENSG00000234928	LINC01659	-2.27073	6.38e-05
ENSG00000225173	AL662890.1	-2.26778	0.0029833
ENSG00000169955	ZNF747	-2.25398	0.0143338
ENSG00000136305	CIDEB	-2.24756	0.000192119
ENSG00000139971	ARMH4	-2.23609	0.000468468
ENSG00000170915	PAQR8	-2.23007	1.98e-63
ENSG00000259040	BLOC1S5-TXNDC5	-2.20615	0.00127926
ENSG00000285791	AC009879.3	-2.1928	8.59e-07
ENSG00000153832	FBXO36	-2.17406	3.49e-05
ENSG00000172638	EFEMP2	-2.16943	1.36e-07
ENSG00000241635	UGT1A1	-2.16755	2.39e-104
ENSG00000132297	HHLA1	-2.15354	0.000554737
ENSG00000107859	PITX3	-2.14873	4.74e-06
ENSG00000174827	PDZK1	-2.14285	1.44e-56
ENSG00000165905	LARGE2	-2.12402	6.09e-12
ENSG00000100784	RPS6KA5	-2.1226	0.0109664
ENSG00000151474	FRMD4A	-2.11515	1.08e-30
ENSG00000006047	YBX2	-2.10694	0.00368221
ENSG00000172955	ADH6	-2.10584	1.39e-22
ENSG00000108950	FAM20A	-2.10386	7.72e-14
ENSG00000101049	SGK2	-2.10055	1.86e-06
ENSG00000198133	TMEM229B	-2.08819	0.00394628
ENSG00000220323	H2BC19P	-2.08581	4.02e-05
ENSG00000247809	NR2F2-AS1	-2.0799	1.89e-45
ENSG00000163710	PCOLCE2	-2.07715	1.43e-16
ENSG00000287416	AC093746.1	-2.07362	6.36e-24
ENSG00000099937	SERPIND1	-2.0671	1.34e-05
ENSG00000280832	GSEC	-2.05982	0.00139019
ENSG00000149809	TM7SF2	-2.05961	8.38e-11
ENSG00000235142	LINC02532	-2.02876	1.66e-32
ENSG00000139597	N4BP2L1	-2.01914	0.0121201
ENSG00000198944	SOWAHA	-2.01908	0.00588824
ENSG00000106785	TRIM14	-2.01242	3.44e-54
ENSG00000135414	GDF11	-2.01033	3.95e-14
ENSG00000163581	SLC2A2	-2.00983	6.51e-115
ENSG00000258525	AL049830.3	-2.00527	0.00709107
ENSG00000274895	AC011700.1	-2.00412	0.00844782
ENSG00000285427	SOD2-OT1	-1.99992	0.00204106
ENSG00000140057	AK7	-1.99925	6.52e-12
ENSG00000260219	CD2BP2-DT	-1.9976	0.00677223
ENSG00000126709	IFI6	-1.97383	1.6e-14
ENSG00000102385	DRP2	-1.95025	0.000495794
ENSG00000185432	METTL7A	-1.94672	1.49e-08
ENSG00000189056	RELN	-1.93501	2.67e-242
ENSG00000073670	ADAM11	-1.9325	7.35e-05
ENSG00000095596	CYP26A1	-1.93125	3.99e-06
ENSG00000182310	SPACA6	-1.93093	1.63e-05
ENSG00000163536	SERPINI1	-1.92921	0.0148511
ENSG00000146205	ANO7	-1.92552	0.00205419
ENSG00000111331	OAS3	-1.92506	4e-60
ENSG00000147571	CRH	-1.92277	4.48e-12
ENSG00000171564	FGB	-1.92277	6.5e-65
ENSG00000168542	COL3A1	-1.91566	0.000895413
ENSG00000253428	LINC01942	-1.91224	1.45e-11
ENSG00000167165	UGT1A6	-1.90518	2.51e-24
ENSG00000099365	STX1B	-1.90035	0.000675003
ENSG00000141497	ZMYND15	-1.89436	4.43e-18
ENSG00000003436	TFPI	-1.89011	5.66e-09
ENSG00000007516	BAIAP3	-1.88024	1.74e-06
ENSG00000128917	DLL4	-1.87481	1.04e-19
ENSG00000170439	METTL7B	-1.87042	2.3e-39
ENSG00000197558	SSPOP	-1.86825	0.0128872
ENSG00000047457	CP	-1.85305	4.81e-64
ENSG00000010310	GIPR	-1.84705	0.00135849
ENSG00000196834	POTEI	-1.83188	4.83e-05
ENSG00000205740	AL359878.1	-1.83155	0.0114555
ENSG00000269386	RAB11B-AS1	-1.82895	6.98e-06
ENSG00000249267	LINC00939	-1.8205	0.0080986
ENSG00000168306	ACOX2	-1.81791	2.45e-16
ENSG00000216775	AL109918.1	-1.81445	9.48e-08
ENSG00000222036	POTEM	-1.81125	5.08e-05
ENSG00000278291	AL161772.1	-1.81094	0.0153925
ENSG00000187583	PLEKHN1	-1.80695	0.0133811
ENSG00000144891	AGTR1	-1.80686	2.53e-45
ENSG00000233215	LINC01687	-1.80661	9.47e-11
ENSG00000215630	GUSBP9	-1.80618	0.00623681
ENSG00000151150	ANK3	-1.80371	2.72e-11
ENSG00000181722	ZBTB20	-1.80043	0.00023809
ENSG00000143494	VASH2	-1.79847	0.0143003
ENSG00000099994	SUSD2	-1.79161	0.00421517
ENSG00000268471	MIR4453HG	-1.78944	0.000120667
ENSG00000138823	MTTP	-1.78361	1.1e-50
ENSG00000188582	PAQR9	-1.78117	3.42e-35
ENSG00000079385	CEACAM1	-1.77802	0.00351207
ENSG00000175899	A2M	-1.77754	1.65e-195
ENSG00000175155	YPEL2	-1.77541	4.6e-13
ENSG00000138336	TET1	-1.77034	6.86e-13
ENSG00000288569	AC008394.1	-1.76564	0.0149142
ENSG00000274292	AC084018.2	-1.76128	0.00213738
ENSG00000286231	AL445423.3	-1.74923	8.81e-06
ENSG00000227392	HPN-AS1	-1.74751	0.00240348
ENSG00000213949	ITGA1	-1.72343	3.39e-42
ENSG00000235257	ITGA9-AS1	-1.71871	3.39e-05
ENSG00000182472	CAPN12	-1.71393	0.00472247
ENSG00000250413	AC005674.1	-1.71339	0.000997161
ENSG00000138640	FAM13A	-1.71293	3.78e-05
ENSG00000118515	SGK1	-1.71051	1.24e-30
ENSG00000275718	CCL15	-1.70805	3.19e-14
ENSG00000176912	TYMSOS	-1.70448	0.00096681
ENSG00000239791	AC002310.2	-1.69338	0.00545621
ENSG00000283526	PRRT1B	-1.68217	2.61e-21
ENSG00000186897	C1QL4	-1.6818	1.5e-07
ENSG00000185551	NR2F2	-1.68066	4.2e-57
ENSG00000165923	AGBL2	-1.67768	0.00169296
ENSG00000270889	AC087072.1	-1.67456	0.00698319
ENSG00000115365	LANCL1	-1.6719	9.57e-97
ENSG00000115415	STAT1	-1.66785	3.33e-131
ENSG00000186480	INSIG1	-1.6654	3.55e-13
ENSG00000272031	ANKRD34A	-1.65532	1.35e-05
ENSG00000279453	Z99129.4	-1.65351	0.00213984
ENSG00000112394	SLC16A10	-1.64769	8.54e-14
ENSG00000247095	MIR210HG	-1.64172	0.00112641
ENSG00000163631	ALB	-1.64077	1.72e-35
ENSG00000273295	AP000350.6	-1.64059	0.00174747
ENSG00000197385	ZNF860	-1.63786	4.48e-06
ENSG00000117114	ADGRL2	-1.63362	5.59e-153
ENSG00000287596	AC066614.1	-1.62452	0.00447688
ENSG00000102879	CORO1A	-1.62281	0.00902784
ENSG00000050628	PTGER3	-1.62109	0.00304705
ENSG00000250799	PRODH2	-1.60636	1.53e-14
ENSG00000286714	AC093001.2	-1.6059	1.98e-06
ENSG00000123453	SARDH	-1.60387	3.64e-08
ENSG00000285230	RALY-AS1	-1.59844	7.98e-05
ENSG00000122035	RASL11A	-1.59712	5.13e-06
ENSG00000107201	DDX58	-1.59677	1.53e-17
ENSG00000226510	UPK1A-AS1	-1.58935	5.88e-07
ENSG00000106006	HOXA6	-1.58512	9.89e-06
ENSG00000100100	PIK3IP1	-1.58189	0.00120727
ENSG00000119711	ALDH6A1	-1.55753	1.08e-12
ENSG00000100344	PNPLA3	-1.55558	7.83e-06
ENSG00000257390	AC023055.1	-1.55501	0.0019529
ENSG00000134215	VAV3	-1.55335	1.18e-08
ENSG00000232485	RPL37A-DT	-1.55062	0.0154567
ENSG00000188313	PLSCR1	-1.54819	1.42e-18
ENSG00000172935	MRGPRF	-1.54282	0.0104713
ENSG00000171557	FGG	-1.5407	4.77e-156
ENSG00000163840	DTX3L	-1.5335	2.1e-18
ENSG00000286403	AC010378.1	-1.53148	1.88e-07
ENSG00000138642	HERC6	-1.52936	5.59e-10
ENSG00000184203	PPP1R2	-1.5164	5.73e-81
ENSG00000183044	ABAT	-1.51201	2.03e-09
ENSG00000160781	PAQR6	-1.51173	0.000173528
ENSG00000055332	EIF2AK2	-1.50713	2.95e-64
ENSG00000232656	IDI2-AS1	-1.50465	0.0163572
ENSG00000099194	SCD	-1.50176	1.56e-32
ENSG00000107282	APBA1	-1.50164	0.00627209
ENSG00000126838	PZP	-1.49628	2.27e-14
ENSG00000134363	FST	-1.49361	4.72e-78
ENSG00000236901	MIR600HG	-1.49286	0.00176957
ENSG00000154040	CABYR	-1.48888	9.73e-05
ENSG00000106780	MEGF9	-1.48811	1.42e-24
ENSG00000215271	HOMEZ	-1.48402	0.000155539
ENSG00000186310	NAP1L3	-1.48116	0.00021427
ENSG00000148832	PAOX	-1.48111	0.0101127
ENSG00000171560	FGA	-1.48042	1.37e-172
ENSG00000067064	IDI1	-1.47907	8.46e-08
ENSG00000285565	AL671762.1	-1.47541	6.3e-09
ENSG00000132749	TESMIN	-1.47487	0.00798352
ENSG00000135899	SP110	-1.47346	9.88e-18
ENSG00000136237	RAPGEF5	-1.47269	2.06e-13
ENSG00000105928	GSDME	-1.46899	0.013641
ENSG00000256162	SMLR1	-1.46239	5.54e-14
ENSG00000198535	C2CD4A	-1.46091	3.1e-09
ENSG00000244187	TMEM141	-1.46065	6.9e-10
ENSG00000175426	PCSK1	-1.45861	0.00146806
ENSG00000101115	SALL4	-1.45826	1.41e-24
ENSG00000278950	AC138907.8	-1.45754	0.0120612
ENSG00000131482	G6PC	-1.45552	4.38e-17
ENSG00000213213	CCDC183	-1.45419	2.63e-18
ENSG00000272398	CD24	-1.44842	4.11e-82
ENSG00000131650	KREMEN2	-1.44841	8.1e-05
ENSG00000125434	SLC25A35	-1.44711	2.26e-10
ENSG00000136883	KIF12	-1.44524	3.32e-09
ENSG00000228109	MELTF-AS1	-1.44472	0.0154308
ENSG00000257315	ZBED6	-1.44125	4.15e-05
ENSG00000234028	EIF2AK3-DT	-1.44011	0.000922688
ENSG00000231793	DOC2GP	-1.4398	5.91e-13
ENSG00000188167	TMPPE	-1.43005	0.000251905
ENSG00000135424	ITGA7	-1.42551	6.11e-15
ENSG00000172461	FUT9	-1.42536	0.00450844
ENSG00000105655	ISYNA1	-1.42503	0.0010955
ENSG00000181444	ZNF467	-1.42391	6.09e-06
ENSG00000184925	LCN12	-1.41874	5.4e-05
ENSG00000187185	AC092118.1	-1.41653	0.00264541
ENSG00000080493	SLC4A4	-1.41429	1.55e-09
ENSG00000260630	SNAI3-AS1	-1.40802	0.00146214
ENSG00000255277	ABCC6P2	-1.40736	1.53e-05
ENSG00000243696	AC006254.1	-1.40483	0.00903948
ENSG00000138439	FAM117B	-1.39803	1.75e-11
ENSG00000183935	HTR7P1	-1.39794	0.00993371
ENSG00000223776	LGALS8-AS1	-1.39553	0.00224595
ENSG00000165795	NDRG2	-1.39544	1.15e-23
ENSG00000263843	AC022211.2	-1.39199	0.00923738
ENSG00000115414	FN1	-1.39187	1.18e-196
ENSG00000166104	AC126323.1	-1.39133	4.13e-74
ENSG00000257167	TMPO-AS1	-1.39058	1e-05
ENSG00000274979	AC020656.2	-1.39037	0.0118469
ENSG00000180089	TMEM86B	-1.38872	0.00344228
ENSG00000278834	AC073508.3	-1.3884	0.00163746
ENSG00000163040	CCDC74A	-1.38213	0.000577164
ENSG00000004777	ARHGAP33	-1.37999	2.55e-05
ENSG00000198780	FAM169A	-1.37915	9.67e-31
ENSG00000166450	PRTG	-1.36867	1.38e-12
ENSG00000226985	LINC01203	-1.36846	1.23e-10
ENSG00000160191	PDE9A	-1.36607	7.76e-07
ENSG00000213928	IRF9	-1.36352	5.67e-22
ENSG00000280239	AC011498.7	-1.36251	0.0064686
ENSG00000171451	DSEL	-1.36201	4.1e-10
ENSG00000214435	AS3MT	-1.3605	2.59e-35
ENSG00000100625	SIX4	-1.35959	1.27e-05
ENSG00000241570	PAQR9-AS1	-1.35934	0.00131948
ENSG00000133519	ZDHHC8P1	-1.35887	1.48e-09
ENSG00000149948	HMGA2	-1.35647	1.22e-52
ENSG00000180914	OXTR	-1.35373	0.000146924
ENSG00000184979	USP18	-1.35269	1.05e-07
ENSG00000070759	TESK2	-1.35021	0.00740212
ENSG00000168237	GLYCTK	-1.34849	8.93e-15
ENSG00000116962	NID1	-1.3449	1.64e-78
ENSG00000126246	IGFLR1	-1.33972	0.000729063
ENSG00000165092	ALDH1A1	-1.33934	4.36e-112
ENSG00000240758	AC010655.2	-1.33933	0.0054712
ENSG00000269749	AC005614.2	-1.33877	0.0014352
ENSG00000131389	SLC6A6	-1.33735	3.52e-26
ENSG00000154080	CHST9	-1.33396	5.03e-20
ENSG00000214922	HLA-F-AS1	-1.331	0.000422139
ENSG00000176533	GNG7	-1.32919	0.00314348
ENSG00000115290	GRB14	-1.32896	8.16e-13
ENSG00000180739	S1PR5	-1.32703	0.00185715
ENSG00000204305	AGER	-1.32697	1.57e-09
ENSG00000178585	CTNNBIP1	-1.32521	4.17e-12
ENSG00000129951	PLPPR3	-1.32455	2.4e-05
ENSG00000073910	FRY	-1.32121	7.87e-36
ENSG00000100968	NFATC4	-1.31641	0.00122174
ENSG00000245105	A2M-AS1	-1.31546	0.012478
ENSG00000225756	DBH-AS1	-1.31302	0.00199166
ENSG00000105289	TJP3	-1.31229	0.01603
ENSG00000121858	TNFSF10	-1.30949	2.1e-11
ENSG00000184154	LRTOMT	-1.30217	0.00882816
ENSG00000113161	HMGCR	-1.30135	1.96e-44
ENSG00000006468	ETV1	-1.29999	1.25e-12
ENSG00000016082	ISL1	-1.29611	4.49e-05
ENSG00000122707	RECK	-1.29574	0.0002507
ENSG00000180525	PRR26	-1.29567	1.5e-10
ENSG00000185189	NRBP2	-1.29354	5.58e-14
ENSG00000157379	DHRS1	-1.29243	2.25e-09
ENSG00000169093	ASMTL	-1.28992	2.98e-43
ENSG00000231742	LINC01273	-1.28598	0.00239423
ENSG00000149582	TMEM25	-1.285	0.0130307
ENSG00000104081	BMF	-1.2823	8.02e-15
ENSG00000171097	KYAT1	-1.28015	0.00116459
ENSG00000123080	CDKN2C	-1.2796	9.24e-19
ENSG00000261189	AL031058.1	-1.27936	3.46e-05
ENSG00000166816	LDHD	-1.2759	0.000397834
ENSG00000001617	SEMA3F	-1.27543	0.00875862
ENSG00000137804	NUSAP1	-1.27533	5.24e-40
ENSG00000170525	PFKFB3	-1.27001	3.66e-45
ENSG00000113946	CLDN16	-1.26624	0.00126897
ENSG00000182902	SLC25A18	-1.26485	0.00209391
ENSG00000139190	VAMP1	-1.26261	0.00143661
ENSG00000175567	UCP2	-1.26259	3.36e-12
ENSG00000133424	LARGE1	-1.25932	1.07e-26
ENSG00000117834	SLC5A9	-1.25492	0.000245275
ENSG00000261227	AC140912.1	-1.25463	0.00731331
ENSG00000105516	DBP	-1.25408	1.34e-07
ENSG00000197044	ZNF441	-1.25243	3.13e-08
ENSG00000137135	ARHGEF39	-1.24901	8.54e-12
ENSG00000256937	KRT17P8	-1.24817	0.00190738
ENSG00000227214	HCG15	-1.24708	1.12e-06
ENSG00000019186	CYP24A1	-1.24318	3.16e-35
ENSG00000095637	SORBS1	-1.23699	9.54e-28
ENSG00000266074	BAHCC1	-1.23686	7.3e-08
ENSG00000168062	BATF2	-1.23495	8.95e-08
ENSG00000113328	CCNG1	-1.23244	1.03e-22
ENSG00000250462	LRRC37BP1	-1.23153	6.35e-16
ENSG00000047634	SCML1	-1.23022	1.86e-34
ENSG00000184588	PDE4B	-1.22922	1.05e-11
ENSG00000112297	CRYBG1	-1.22673	0.0007168
ENSG00000157657	ZNF618	-1.22617	2.97e-11
ENSG00000112773	TENT5A	-1.22615	6.73e-29
ENSG00000119125	GDA	-1.22614	1.56e-11
ENSG00000113119	TMCO6	-1.226	2.23e-11
ENSG00000140807	NKD1	-1.22561	0.0008134
ENSG00000261572	AC097639.1	-1.2203	7.26e-05
ENSG00000279192	PWAR5	-1.22007	2.27e-05
ENSG00000197183	NOL4L	-1.21866	0.000322245
ENSG00000135617	PRADC1	-1.21615	5.79e-07
ENSG00000162576	MXRA8	-1.21034	0.00748053
ENSG00000139354	GAS2L3	-1.2102	1.84e-32
ENSG00000115267	IFIH1	-1.20801	3.88e-15
ENSG00000245750	DRAIC	-1.20764	2.56e-05
ENSG00000156398	SFXN2	-1.2076	1.46e-08
ENSG00000114268	PFKFB4	-1.20754	5.41e-07
ENSG00000105088	OLFM2	-1.20295	5.54e-18
ENSG00000169902	TPST1	-1.20248	2.36e-15
ENSG00000152076	CCDC74B	-1.20156	0.00155875
ENSG00000230438	SERPINB9P1	-1.19916	0.00112301
ENSG00000176928	GCNT4	-1.19652	2.58e-21
ENSG00000148842	CNNM2	-1.19623	2.72e-25
ENSG00000165821	SALL2	-1.1951	8.15e-05
ENSG00000196502	SULT1A1	-1.19411	0.0106948
ENSG00000164056	SPRY1	-1.19324	4.8e-13
ENSG00000187244	BCAM	-1.19125	1.61e-09
ENSG00000227598	Z94721.1	-1.19093	0.003379
ENSG00000104327	CALB1	-1.1908	2.97e-51
ENSG00000174804	FZD4	-1.18961	1.49e-15
ENSG00000153363	LINC00467	-1.18948	0.0078875
ENSG00000267002	AC060780.1	-1.18935	5.99e-13
ENSG00000196782	MAML3	-1.18883	1.69e-16
ENSG00000138646	HERC5	-1.18865	1.02e-10
ENSG00000128394	APOBEC3F	-1.1877	6.85e-09
ENSG00000137713	PPP2R1B	-1.18758	4.55e-67
ENSG00000115159	GPD2	-1.18742	1.5e-34
ENSG00000179222	MAGED1	-1.1846	5.06e-38
ENSG00000183762	KREMEN1	-1.18425	4.92e-12
ENSG00000189319	FAM53B	-1.18373	7.15e-07
ENSG00000258529	AP001781.2	-1.18331	5.73e-13
ENSG00000141295	SCRN2	-1.17872	2.91e-08
ENSG00000185920	PTCH1	-1.17723	7.35e-09
ENSG00000163521	GLB1L	-1.1767	8.28e-06
ENSG00000269293	ZSCAN16-AS1	-1.17249	0.00798295
ENSG00000181856	SLC2A4	-1.1714	0.00160761
ENSG00000169562	GJB1	-1.17075	2.12e-48
ENSG00000066279	ASPM	-1.1696	3.17e-31
ENSG00000126016	AMOT	-1.1664	2.61e-20
ENSG00000066739	ATG2B	-1.16449	7.4e-25
ENSG00000180425	C11orf71	-1.16407	5.82e-06
ENSG00000171759	PAH	-1.16269	4.25e-15
ENSG00000160298	C21orf58	-1.16256	4.12e-08
ENSG00000110063	DCPS	-1.16231	1.01e-47
ENSG00000183248	PRR36	-1.15982	8.19e-06
ENSG00000143412	ANXA9	-1.15861	5.22e-21
ENSG00000188878	FBF1	-1.15673	0.00123331
ENSG00000154529	CNTNAP3B	-1.15667	6.93e-12
ENSG00000105668	UPK1A	-1.15628	0.000137303
ENSG00000138641	HERC3	-1.15484	2.56e-05
ENSG00000111817	DSE	-1.15442	7.33e-18
ENSG00000188277	C15orf62	-1.15358	0.0062367
ENSG00000260062	GOLGA2P11	-1.15001	0.00175742
ENSG00000111801	BTN3A3	-1.14793	0.00181706
ENSG00000130304	SLC27A1	-1.14555	9.55e-06
ENSG00000206052	DOK6	-1.14305	1.88e-05
ENSG00000174501	ANKRD36C	-1.14294	7.06e-12
ENSG00000002549	LAP3	-1.14204	3.64e-47
ENSG00000164687	FABP5	-1.14088	3.27e-34
ENSG00000239883	PARGP1	-1.13893	0.00337647
ENSG00000103479	RBL2	-1.13888	7.62e-20
ENSG00000165879	FRAT1	-1.13738	8.17e-16
ENSG00000119227	PIGZ	-1.13525	3.86e-09
ENSG00000143815	LBR	-1.13022	7.94e-32
ENSG00000223764	LINC02593	-1.12992	5.66e-13
ENSG00000124374	PAIP2B	-1.12488	3.76e-05
ENSG00000054793	ATP9A	-1.1239	3.89e-24
ENSG00000179918	SEPHS2	-1.12261	2.41e-86
ENSG00000063127	SLC6A16	-1.12247	0.00362766
ENSG00000061656	SPAG4	-1.12075	7.31e-05
ENSG00000230426	LINC01036	-1.1187	0.000360053
ENSG00000117724	CENPF	-1.11826	3.47e-47
ENSG00000214719	AC005562.1	-1.11615	8.39e-36
ENSG00000111846	GCNT2	-1.11584	1.97e-17
ENSG00000288043	AC006511.6	-1.11422	0.000109031
ENSG00000106976	DNM1	-1.11337	0.0153473
ENSG00000270316	BORCS7-ASMT	-1.11113	1.41e-26
ENSG00000008311	AASS	-1.11096	3.33e-07
ENSG00000215068	AC025171.2	-1.11053	0.00139146
ENSG00000171236	LRG1	-1.1095	2.34e-14
ENSG00000147130	ZMYM3	-1.10802	5.95e-37
ENSG00000161682	FAM171A2	-1.10653	0.000117273
ENSG00000285762	AC253536.7	-1.10645	0.00628728
ENSG00000140451	PIF1	-1.10148	4.3e-08
ENSG00000163683	SMIM14	-1.10142	7.25e-06
ENSG00000247400	DNAJC3-DT	-1.09721	0.0118341
ENSG00000204528	PSORS1C3	-1.09462	0.000155373
ENSG00000104833	TUBB4A	-1.09004	2.05e-10
ENSG00000186193	SAPCD2	-1.08761	2.14e-14
ENSG00000204128	C2orf72	-1.08655	7.39e-30
ENSG00000284922	AP000812.5	-1.08382	0.000359485
ENSG00000235655	H3P6	-1.08377	6.98e-10
ENSG00000155846	PPARGC1B	-1.08374	9.31e-06
ENSG00000148700	ADD3	-1.07708	5.11e-17
ENSG00000213366	GSTM2	-1.07551	3.54e-05
ENSG00000285897	AC004687.2	-1.07537	5.24e-06
ENSG00000256771	ZNF253	-1.07309	0.00898756
ENSG00000167701	GPT	-1.06869	0.00157853
ENSG00000145246	ATP10D	-1.0675	7.37e-12
ENSG00000273382	AL356488.3	-1.06652	0.000145027
ENSG00000104870	FCGRT	-1.06644	8.66e-11
ENSG00000174599	TRAM1L1	-1.06423	0.0020108
ENSG00000005189	REXO5	-1.06404	0.000248672
ENSG00000147257	GPC3	-1.0639	7.7e-27
ENSG00000143869	GDF7	-1.06357	1.63e-08
ENSG00000182057	OGFRP1	-1.06306	6.61e-05
ENSG00000139679	LPAR6	-1.063	0.0032461
ENSG00000104213	PDGFRL	-1.06181	0.00453463
ENSG00000205413	SAMD9	-1.06169	0.000997535
ENSG00000154611	PSMA8	-1.0615	0.0126853
ENSG00000164142	FAM160A1	-1.06037	0.00234385
ENSG00000197969	VPS13A	-1.06023	3.75e-28
ENSG00000186470	BTN3A2	-1.05924	9.04e-08
ENSG00000063180	CA11	-1.05638	7.82e-10
ENSG00000196155	PLEKHG4	-1.0551	0.0116417
ENSG00000162415	ZSWIM5	-1.0547	6.45e-14
ENSG00000257512	AC124947.2	-1.05288	0.0105997
ENSG00000085871	MGST2	-1.05154	2.28e-14
ENSG00000205213	LGR4	-1.05087	3.06e-48
ENSG00000165801	ARHGEF40	-1.04914	1.93e-16
ENSG00000059804	SLC2A3	-1.04791	1.15e-49
ENSG00000288602	C8orf44-SGK3	-1.04758	0.01031
ENSG00000196914	ARHGEF12	-1.04755	1.76e-64
ENSG00000112984	KIF20A	-1.04626	1.8e-15
ENSG00000255121	CCDC84-DT	-1.04566	5.36e-07
ENSG00000121104	FAM117A	-1.04544	0.000143118
ENSG00000137266	SLC22A23	-1.04524	2.22e-26
ENSG00000080947	CROCCP3	-1.04455	0.00572382
ENSG00000185885	IFITM1	-1.04396	0.000286193
ENSG00000182054	IDH2	-1.04323	1.75e-33
ENSG00000184898	RBM43	-1.04282	0.00411769
ENSG00000145703	IQGAP2	-1.04137	1.22e-25
ENSG00000164638	SLC29A4	-1.04119	2.66e-10
ENSG00000018236	CNTN1	-1.04043	2.16e-53
ENSG00000079691	CARMIL1	-1.04038	2.88e-16
ENSG00000140043	PTGR2	-1.04022	2.4e-07
ENSG00000197417	SHPK	-1.03846	2.24e-10
ENSG00000205269	TMEM170B	-1.03804	1.35e-09
ENSG00000254109	RBPMS-AS1	-1.03767	0.012546
ENSG00000152952	PLOD2	-1.03734	3.26e-14
ENSG00000149646	CNBD2	-1.03693	0.0127738
ENSG00000107331	ABCA2	-1.03616	4.91e-27
ENSG00000075651	PLD1	-1.03615	1.81e-30
ENSG00000269821	KCNQ1OT1	-1.03613	2.51e-06
ENSG00000179029	TMEM107	-1.036	0.00181005
ENSG00000148158	SNX30	-1.03517	2.72e-11
ENSG00000182957	SPATA13	-1.03496	6.74e-09
ENSG00000235501	AC105942.1	-1.03365	6.21e-06
ENSG00000224616	RTCA-AS1	-1.03028	0.000253676
ENSG00000151014	NOCT	-1.02613	0.000138116
ENSG00000267475	AC008736.1	-1.02577	0.00141544
ENSG00000137103	TMEM8B	-1.02575	0.0137022
ENSG00000108852	MPP2	-1.02527	0.0122773
ENSG00000147100	SLC16A2	-1.02382	1.1e-19
ENSG00000081026	MAGI3	-1.02331	4.93e-12
ENSG00000067992	PDK3	-1.02143	6.73e-18
ENSG00000106804	C5	-1.01995	2.42e-15
ENSG00000111670	GNPTAB	-1.01952	4.44e-17
ENSG00000189195	BTBD8	-1.01932	9.05e-06
ENSG00000204634	TBC1D8	-1.01921	1.23e-34
ENSG00000187189	TSPYL4	-1.01688	5.12e-10
ENSG00000180776	ZDHHC20	-1.01487	1.45e-26
ENSG00000196743	GM2A	-1.01303	6.62e-17
ENSG00000182272	B4GALNT4	-1.00965	0.000480913
ENSG00000206535	LNP1	-1.00687	0.000625142
ENSG00000108239	TBC1D12	-1.0043	8.97e-18
ENSG00000185829	ARL17A	-1.00164	0.000745157
